# Supplementary material for: Synthesis and optical properties of antimony(v) complexes of a trianionic N2O2-type tetradentate dipyrrin ligand
Source: Royal Society of Chemistry journal article supplement (doi:10.1039/d4cc00630e), 2024-01-01

### Table of Contents

|                                                                                          |     |
|------------------------------------------------------------------------------------------|-----|
| General remarks                                                                          | S2  |
| Synthesis of the new compounds                                                           | S2  |
| Crystallographic analysis                                                                | S6  |
| DFT calculations                                                                         | S13 |
| PLQY measurement                                                                         | S27 |
| References                                                                               | S28 |
| $^1\text{H}$ and $^{13}\text{C}$ NMR and HRMS spectra of the newly synthesized compounds | S29 |

## General remarks

All the manipulations were carried out under dry argon atmosphere using the standard Schlenk technique unless otherwise noted. 2-(2,4-Di-*tert*-butylphenyl)-1*H*-pyrrole was prepared according to a literature.<sup>S1</sup> <sup>1</sup>H and <sup>13</sup>C NMR spectra were recorded on a Bruker Avance III (<sup>1</sup>H: 400 MHz, <sup>13</sup>C: 100 MHz) or on a JEOL JNM-ECZ600R (<sup>1</sup>H: 600 MHz, <sup>13</sup>C: 150 MHz) spectrometer and referenced to appropriate internal or external standard (SiMe<sub>4</sub>). Chemical shifts were reported as the delta scale in ppm. High-resolution mass spectra (HRMS) were recorded on a Bruker micrOTOF mass spectrometer (ionization mode: APCI or ESI). UV/vis spectra were recorded on a Shimadzu UV-3101PC or a JASCO V-670 spectrometer. Fluorescence spectra were measured using a Hitachi F-4500 or on a JASCO FP-8600 spectrometer.

## Synthesis of the new compounds

### Synthesis of LHMe<sub>2</sub>.

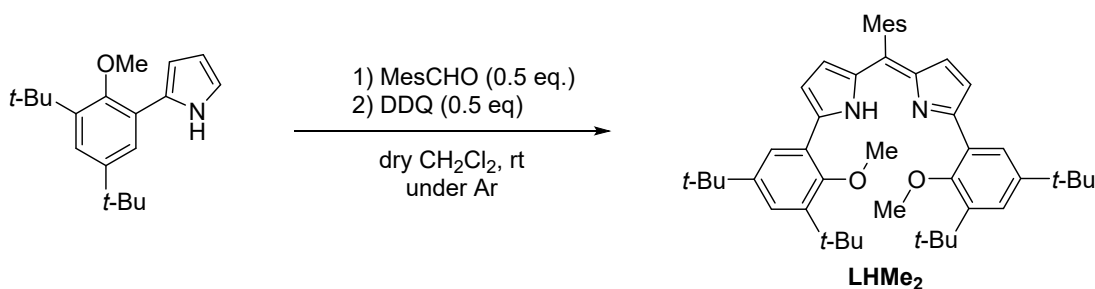

A mixture of 2-(2,4-di-*tert*-butylphenyl)-1*H*-pyrrole (0.86 g, 3.0 mmol), 2,4,6-trimethylbenzaldehyde (MesCHO) (0.22 g, 1.5 mmol), CF<sub>3</sub>COOH (0.034 mL, 0.45 mmol), and CH<sub>2</sub>Cl<sub>2</sub> (75 mL) was stirred at rt under dark for 3 h. The mixture was treated with 2,3-dichloro-5,6-dicyano-1,4-benzoquinone (DDQ) (0.34 g, 1.5 mmol) and stirred for 5 h. Triethylamine (0.062 mL, 0.45 mmol) was added, and the mixture was further stirred for 0.5 h. The mixture was filtered through an Al<sub>2</sub>O<sub>3</sub> short path column using CH<sub>2</sub>Cl<sub>2</sub> as an eluent and evaporated under reduced pressure. The residue was subjected to column chromatography (SiO<sub>2</sub>, CH<sub>2</sub>Cl<sub>2</sub>/AcOEt = 1 : 0 to 5 : 1 in v/v) to afford **LHMe<sub>2</sub>** as an orange solid (0.98 g, 1.4 mmol, 47%).

<sup>1</sup>H NMR (CDCl<sub>3</sub>, 400 MHz)  $\delta$  7.53 (d,  $J$  = 2.6 Hz, 2H), 7.34 (d,  $J$  = 2.6 Hz, 2H), 6.96 (s, 2H), 6.69 (d,  $J$  = 4.2 Hz, 2H), 6.40 (d,  $J$  = 4.2 Hz, 2H), 3.62 (s, 6H), 2.38 (s, 3H), 2.19 (s, 6H), 1.43 (s, 18H), 1.33 (s, 18H). <sup>13</sup>C NMR (CDCl<sub>3</sub>, 150 MHz)  $\delta$  155.97, 153.75, 145.30, 142.03, 141.09, 137.20, 137.13, 136.93, 134.31, 127.71, 127.20, 126.98, 125.00, 124.70, 118.92, 61.41, 35.33, 34.53, 31.55, 31.02, 21.16, 20.05. HRMS (APCI)  $m/z$  calcd for C<sub>48</sub>H<sub>62</sub>N<sub>2</sub>O<sub>2</sub> 699.4884 [M+H]<sup>+</sup>; observed: 699.4884.

### Synthesis of LH<sub>3</sub>.

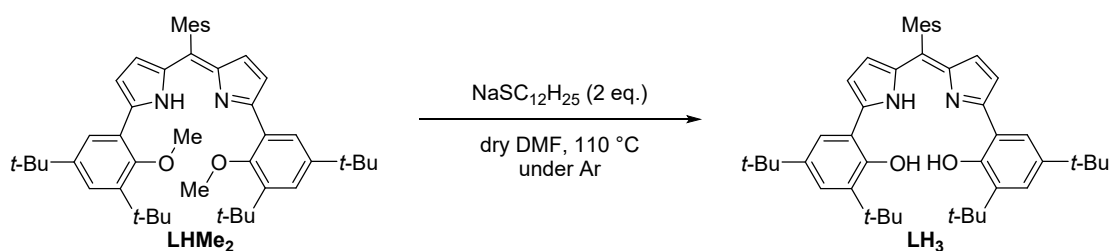

To a mixture of NaH (60 wt% dispersion in a mineral oil, 0.16 g, ca. 4.1 mmol) and DMF (10 mL) was added 1-dodecanethiol (0.96 mL, 4.0 mmol), and the mixture was stirred at rt for 1 h. **LHMe<sub>2</sub>** (0.70 g, 1.0 mmol) was added, and the mixture was stirred at 110 °C for 4 h. aq. NH<sub>4</sub>Cl (2 mL) and distilled water (3 mL) were added, and the mixture was extracted with AcOEt. The organic layer was dried over MgSO<sub>4</sub>, filtered, and concentrated under reduced pressure. The residue was subjected to column chromatography (SiO<sub>2</sub>, hexane/CH<sub>2</sub>Cl<sub>2</sub> = 5 : 1 in v/v) to afford **LH<sub>3</sub>** as a red solid (0.43 g, 0.64 mmol, 64%).

<sup>1</sup>H NMR (CDCl<sub>3</sub>, 400 MHz) δ 7.57(d, *J* = 2.2 Hz, 2H), 7.34 (d, *J* = 2.2 Hz, 2H), 6.95(s, 2H), 6.86 (d, *J* = 3.6 Hz, 2H), 6.45 (d, *J* = 3.6 Hz, 2H), 2.38 (s, 3H), 2.13 (s, 6H), 1.53 (s, 18H), 1.34 (s, 18H) (the OH signals were not observed); <sup>13</sup>C NMR (CDCl<sub>3</sub>, 150 MHz) δ 154.49, 152.50, 141.61, 139.00, 137.14, 136.74, 136.65, 135.56, 134.66, 128.39, 127.59, 124.94, 122.67, 117.88, 116.29, 34.62, 34.07, 31.27, 30.02, 21.86, 19.60; HRMS (APCI) *m/z* calcd for C<sub>46</sub>H<sub>58</sub>N<sub>2</sub>O<sub>2</sub> 671.4571 [M+H]<sup>+</sup>; observed: 671.4510.

### Synthesis of LSbCl<sub>2</sub> and LSbCl(OH) (entry 2 in Table 1)

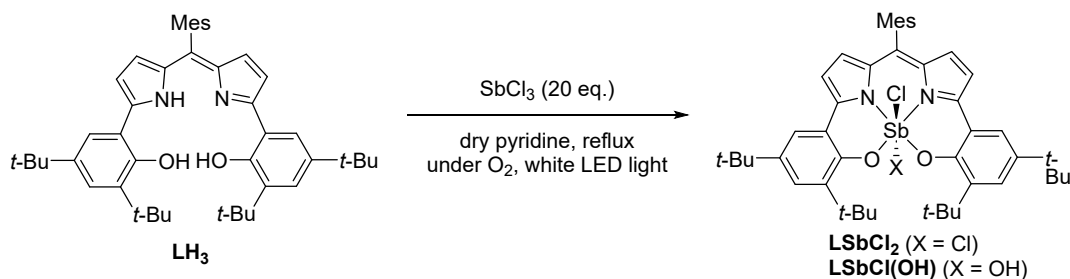

A mixture of SbCl<sub>3</sub> (91 mg, 0.4 mmol) and pyridine (5 mL) was stirred at rt under O<sub>2</sub> atmosphere for 0.5 h before the addition of **LH<sub>3</sub>** (13.4 mg, 0.020 mmol), and then the mixture was refluxed for 24 h under irradiation with a white LED (7 W). Remaining SbCl<sub>3</sub> was removed by filtration using AcOEt as an eluent, and the solvents were removed under reduced pressure. The residue was subjected to column chromatography (SiO<sub>2</sub>, hexane/AcOEt = 12 : 1 in v/v) for afford **LSbCl<sub>2</sub>** (4.1 mg, 0.0048 mmol, 24%) and **LSbCl(OH)** (5.5 mg, 0.0066 mmol, 33%) as dark green solids. **LSbCl<sub>2</sub>**: <sup>1</sup>H NMR (CDCl<sub>3</sub>, 400 MHz) δ 7.58 (d, *J* = 2.6 Hz, 2H), 7.50 (d, *J* = 2.6 Hz, 2H), 7.02 (d, *J* = 4.6 Hz, 2H), 6.99 (s, 2H), 6.67 (d, *J* = 4.6 Hz, 2H), 2.39 (s, 3H), 2.15 (s, 6H), 1.61 (s, 18H), 1.34 (s,

18H).  $^{13}\text{C}$  NMR ( $\text{CDCl}_3$ , 150 MHz)  $\delta$  156.41, 154.73, 142.86, 141.15, 138.58, 138.08, 137.13, 136.63, 132.00, 130.72, 128.74, 128.13, 123.32, 117.15, 116.38, 35.93, 34.38, 31.32, 30.53, 21.19, 19.67. HRMS (APCI)  $m/z$  calcd for  $\text{C}_{46}\text{H}_{55}\text{N}_2\text{O}_2\text{Cl}_2^{121}\text{Sb}$  858.2673,  $\text{C}_{46}\text{H}_{55}\text{N}_2\text{O}_2\text{Cl}_2^{123}\text{Sb}$  860.2668 ( $\text{M}^+$ ); observed 858.2573, 860.2589.

**LSbCl(OH)**:  $^1\text{H}$  NMR ( $\text{CDCl}_3$ , 400 MHz)  $\delta$  7.59 (d,  $J = 2.8$  Hz, 2H), 7.48 (d,  $J = 2.8$  Hz, 2H), 7.04 (d,  $J = 4.6$  Hz, 2H), 6.98 (s, 2H), 6.68 (d,  $J = 4.6$  Hz, 2H), 2.39 (s, 3H), 2.17 (s, 3H), 2.13 (s, 3H), 1.61 (s, 18H), 1.34 (s, 18H) (the OH signal was not observed).  $^{13}\text{C}$  NMR ( $\text{CDCl}_3$ , 150 MHz)  $\delta$  156.63, 155.01, 142.38, 140.93, 138.41, 137.26, 136.90, 132.39, 130.78, 128.26, 128.11, 128.01, 123.40, 117.12, 116.87, 35.93, 34.34, 31.35, 30.47, 21.21, 19.69 (only 4 signals were observed for the benzene ring carbon atoms of the Mes group). HRMS (APCI)  $m/z$  calcd for  $\text{C}_{46}\text{H}_{55}\text{N}_2\text{O}_2\text{Cl}_2^{121}\text{Sb}$  840.3012,  $\text{C}_{46}\text{H}_{55}\text{N}_2\text{O}_2\text{Cl}_2^{123}\text{Sb}$  842.3014 ( $\text{M}^+$ ); observed 840.3015, 842.3047.

### Synthesis of LSbCl<sub>2</sub> (entry 3 in Table 1)

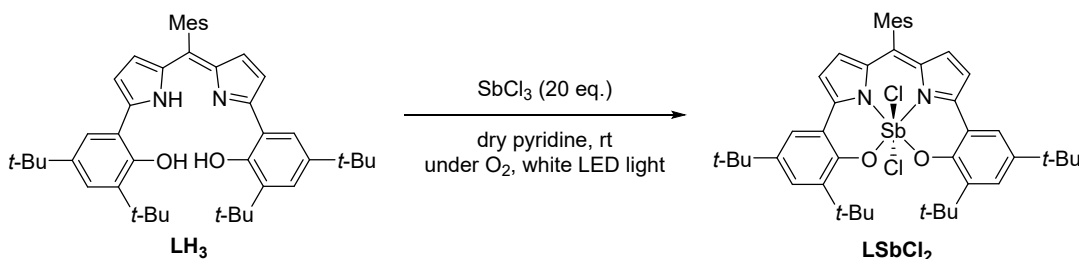

A mixture of  $\text{SbCl}_3$  (0.46 g, 2.0 mmol) and pyridine (25 mL) was stirred at rt under  $\text{O}_2$  atmosphere for 0.5 h before the addition of **LH<sub>3</sub>** (67.1 mg, 0.10 mmol), and then the mixture was stirred at rt for 24 h under irradiation with a white LED (7 W). Remaining  $\text{SbCl}_3$  was removed by filtration using AcOEt as an eluent, and the solvents were removed under reduced pressure. The residue was subjected to column chromatography ( $\text{SiO}_2$ , hexane/AcOEt = 12 : 1 in v/v) for afford **LSbCl<sub>2</sub>** as a dark green solid (46.1 mg, 0.048 mmol, 48%).

### Synthesis of LSb(OH)<sub>2</sub>.

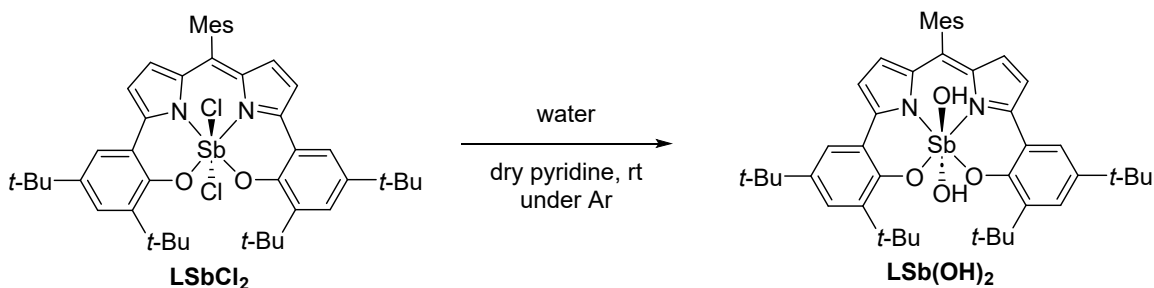

A mixture of **LSbCl<sub>2</sub>** (25.8 mg, 0.030 mmol), pyridine (7.5 mL), and distilled water (1.5 mL) was refluxed for 24 h and then concentrated under reduced pressure. The residue was subjected to column chromatography (SiO<sub>2</sub>, hexane/AcOEt = 12 : 1 in v/v) for afford **LSb(OH)<sub>2</sub>** as a dark green solid (20.1 mg, 0.024 mmol, 81%).

<sup>1</sup>H NMR (CDCl<sub>3</sub>, 400 MHz) δ 7.61 (d, *J* = 2.6 Hz, 2H), 7.46 (d, *J* = 2.6 Hz, 2H), 7.07 (d, *J* = 4.6 Hz, 2H), 6.98 (s, 2H), 6.70 (d, *J* = 4.6 Hz, 2H), 2.39 (s, 3H), 2.14 (s, 6H), 1.62 (s, 18H), 1.33 (s, 18H) (the OH signal was not observed). <sup>13</sup>C NMR (CDCl<sub>3</sub>, 150 MHz) δ 156.63, 155.01, 142.38, 140.93, 138.41, 137.26, 136.90, 132.39, 130.78, 128.26, 128.11, 128.01, 123.40, 117.12, 116.87, 35.93, 34.34, 31.35, 30.47, 21.21, 19.69. HRMS (ESI) *m/z* calcd for C<sub>46</sub>H<sub>57</sub>N<sub>2</sub>O<sub>4</sub><sup>121</sup>Sb 821.3273, C<sub>46</sub>H<sub>57</sub>N<sub>2</sub>O<sub>4</sub><sup>123</sup>Sb 823.3286 ([M-H]<sup>-</sup>); observed 821.3436, 823.3449.

### Stability test of LSbCl<sub>2</sub>

**LSbCl<sub>2</sub>** (5.0 mg, 6 μmol) was dissolved in moisture-saturated CDCl<sub>3</sub> (0.5 mL, containing ca. 1 eq. of H<sub>2</sub>O), and the solution was left under air at room temperature. <sup>1</sup>H NMR and TLC analyses of the mixture did not show that **LSbCl<sub>2</sub>** was not decomposed after 48 h at room temperature.

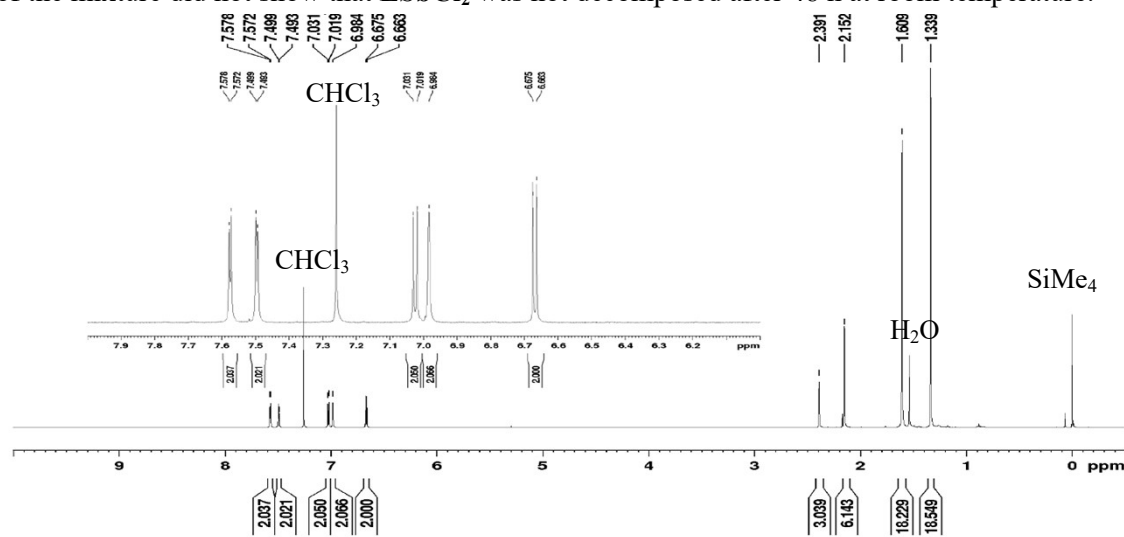

Figure S1. <sup>1</sup>H NMR spectrum (400 MHz, CDCl<sub>3</sub>) of LSbCl<sub>2</sub> measured after 48 h.

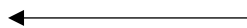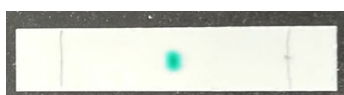

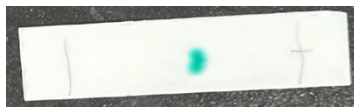

Figure S2. Images of the TLCs ( $\text{SiO}_2$ , AcOEt/hexane = 1:12) of the as-synthesized  $\text{LSbCl}_2$  (top) and the  $\text{CDCl}_3$  solution after 48 h.

### Crystallographic analysis

Single crystal X-ray diffraction (XRD) measurements were carried out on a Rigaku MicroMax-007HF diffractometer equipped with a VariMax light source (Mo K $\alpha$ ,  $\lambda = 0.71073$  Å). The crystals were kept at  $-100$  °C while the data collection. The collected data were processed using the CrysAlisPro (ver. 1.171.41.117a) program package (Rigaku Oxford Diffraction, 2021). Using Olex2,<sup>S2</sup> the structures were solved with the SHELXT and refined with the SHELXL program packages.<sup>S3</sup> The full-matrix least-squares refinements were performed on  $F^2$ . All non-hydrogen atoms were refined anisotropically. Hydrogen atoms were refined using the riding model. Crystallographic data are summarized in the next page. For **LSbCl(OH)**-acetone, axial Cl and OH ligands, one of the *t*-butyl groups, and acetone molecule were disordered over two sites with the occupancy ratios of 95:5, 64:36, and 74:26, respectively. SADI, RIGU, and SIMU restraints were included for the refinement of these disordered parts. In addition, for the disordered Cl and O atoms, EADP constraints were used to refine their anisotropic displacement parameters. CCDC 2296634 (**LSbCl<sub>2</sub>**), 2323628 (**LSbCl(OH)**-acetone), and 2323629 (**LSb(OH)<sub>2</sub>**) contain the additional crystallographic data.

Table S1. Crystallographic data for the Sb(V)-dipyrin complexes.

|                                                                                | <b>LSbCl<sub>2</sub></b>                                                         | <b>LSbCl(OH)-<br/>acetone</b>                                      | <b>LSb(OH)<sub>2</sub></b>                                       |
|--------------------------------------------------------------------------------|----------------------------------------------------------------------------------|--------------------------------------------------------------------|------------------------------------------------------------------|
| Empirical formula                                                              | C <sub>46</sub> H <sub>55</sub> Cl <sub>2</sub> N <sub>2</sub> O <sub>2</sub> Sb | C <sub>49</sub> H <sub>62</sub> ClN <sub>2</sub> O <sub>4</sub> Sb | C <sub>46</sub> H <sub>57</sub> N <sub>2</sub> O <sub>4</sub> Sb |
| Formula weight                                                                 | 860.57                                                                           | 900.20                                                             | 823.68                                                           |
| Crystal system                                                                 | monoclinic                                                                       | monoclinic                                                         | orthorhombic                                                     |
| Space group                                                                    | <i>Cc</i>                                                                        | <i>P2<sub>1</sub>/c</i>                                            | <i>Pbca</i>                                                      |
| <i>a</i> /Å                                                                    | 20.0826(9)                                                                       | 24.3993(6)                                                         | 28.4574(5)                                                       |
| <i>b</i> /Å                                                                    | 14.1346(5)                                                                       | 16.8320(4)                                                         | 27.9101(4)                                                       |
| <i>c</i> /Å                                                                    | 15.2463(7)                                                                       | 11.6630(3)                                                         | 32.3437(6)                                                       |
| $\beta$ /°                                                                     | 100.815(5)                                                                       | 100.297(3)                                                         | 90                                                               |
| <i>V</i> /Å <sup>3</sup>                                                       | 4250.9(3)                                                                        | 4712.7(2)                                                          | 25688.9(8)                                                       |
| <i>Z</i>                                                                       | 4                                                                                | 4                                                                  | 24                                                               |
| $\rho$ /g cm <sup>-3</sup>                                                     | 1.345                                                                            | 1.269                                                              | 1.278                                                            |
| $\mu$ /mm <sup>-1</sup>                                                        | 0.813                                                                            | 0.685                                                              | 0.687                                                            |
| <i>F</i> (000)                                                                 | 1784.0                                                                           | 1880.0                                                             | 10320.0                                                          |
| Crystal size/mm <sup>3</sup>                                                   | 0.218 × 0.093 ×<br>0.089                                                         | 0.238 × 0.158 ×<br>0.138                                           | 0.131 × 0.127 ×<br>0.113                                         |
| $2\theta$ /°                                                                   | 5.44 to 52.738                                                                   | 3.394 to 52.744                                                    | 3.178 to 52.744                                                  |
| Index ranges                                                                   | -25 ≤ <i>h</i> ≤ 25, -17 ≤<br><i>k</i> ≤ 17, -19 ≤ <i>l</i> ≤ 19                 | -30 ≤ <i>h</i> ≤ 30, -21 ≤<br><i>k</i> ≤ 21, -14 ≤ <i>l</i> ≤ 14   | -35 ≤ <i>h</i> ≤ 35, -34 ≤<br><i>k</i> ≤ 34, -40 ≤ <i>l</i> ≤ 40 |
| Reflections collected                                                          | 30936                                                                            | 76821                                                              | 281142                                                           |
| Independent reflections<br>( <i>R</i> <sub>int</sub> , <i>R</i> <sub>σ</sub> ) | 8642 (0.1105,<br>0.0922)                                                         | 9643 (0.0352,<br>0.0170)                                           | 26265 (0.1196,<br>0.0532)                                        |
| Data/restraints/parameters                                                     | 8642/2/493                                                                       | 9643/131/601                                                       | 26265/0/1493                                                     |
| GOF on <i>F</i> <sup>2</sup>                                                   | 1.006                                                                            | 1.043                                                              | 1.024                                                            |
| <i>R</i> <sub>1</sub> ( <i>I</i> ≥ 2σ( <i>I</i> ))                             | 0.0480                                                                           | 0.0273                                                             | 0.0427                                                           |
| <i>wR</i> <sub>2</sub> (all data)                                              | 0.0934                                                                           | 0.0724                                                             | 0.0875                                                           |
| Largest diff. peak/hole /e<br>Å <sup>-3</sup>                                  | 0.97/-0.78                                                                       | 0.50/-0.32                                                         | 0.57/-0.42                                                       |
| Flack parameter                                                                | -0.012(14)                                                                       | —                                                                  | —                                                                |



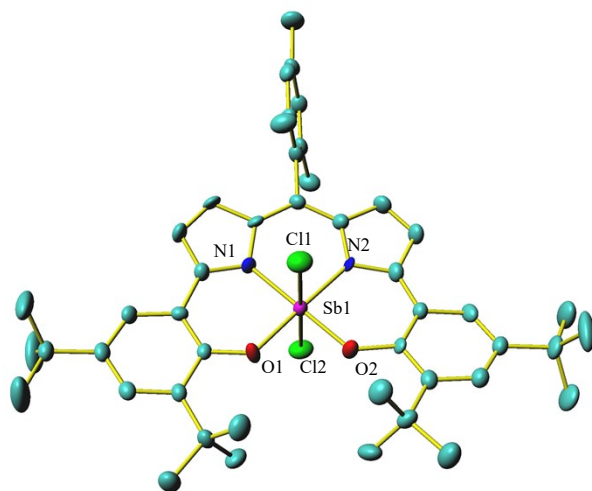

Figure S3. Molecular structure of **LSbCl<sub>2</sub>**.

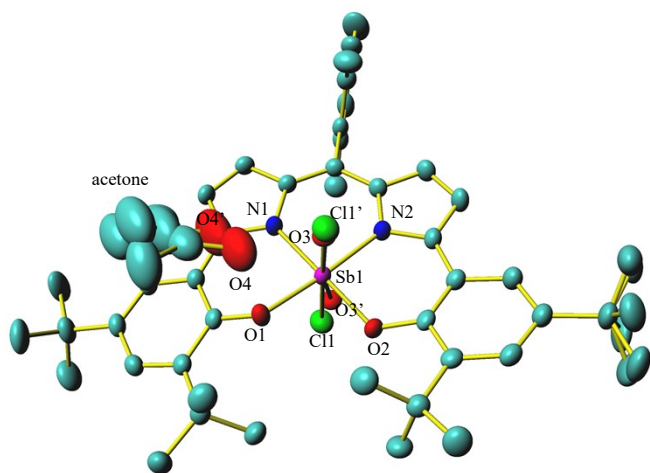

Figure S4. Molecular structure of **LSbCl(OH)**-acetone.

Major part (Cl, O: 95%, *t*Bu: 64%, acetone: 74%)

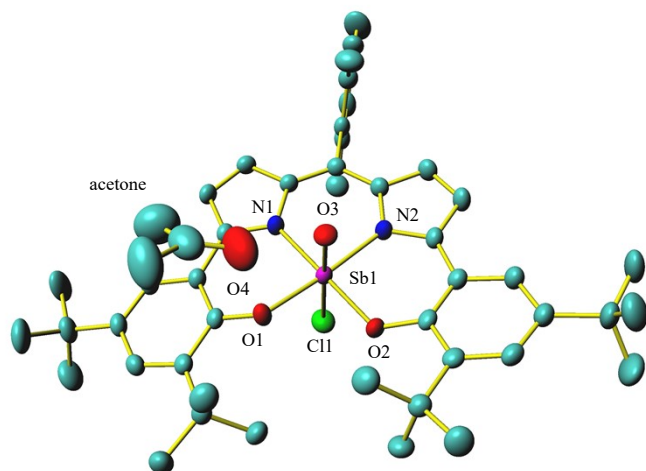

Minor part (Cl, O: 5%, *t*Bu: 36%, acetone: 26%)

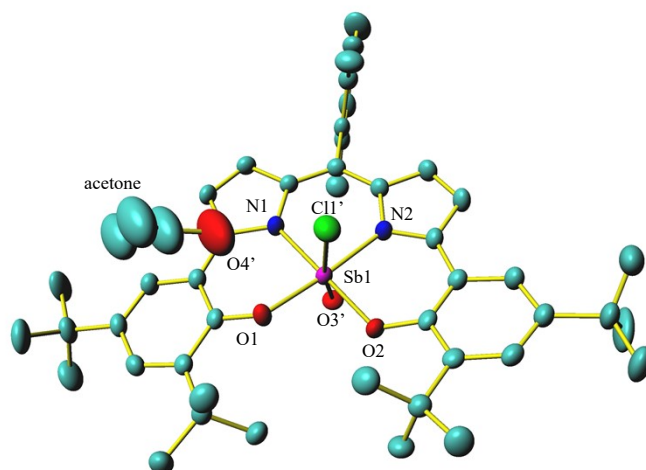

Figure S5. Major and minor parts of **LSbCl(OH)-acetone**.

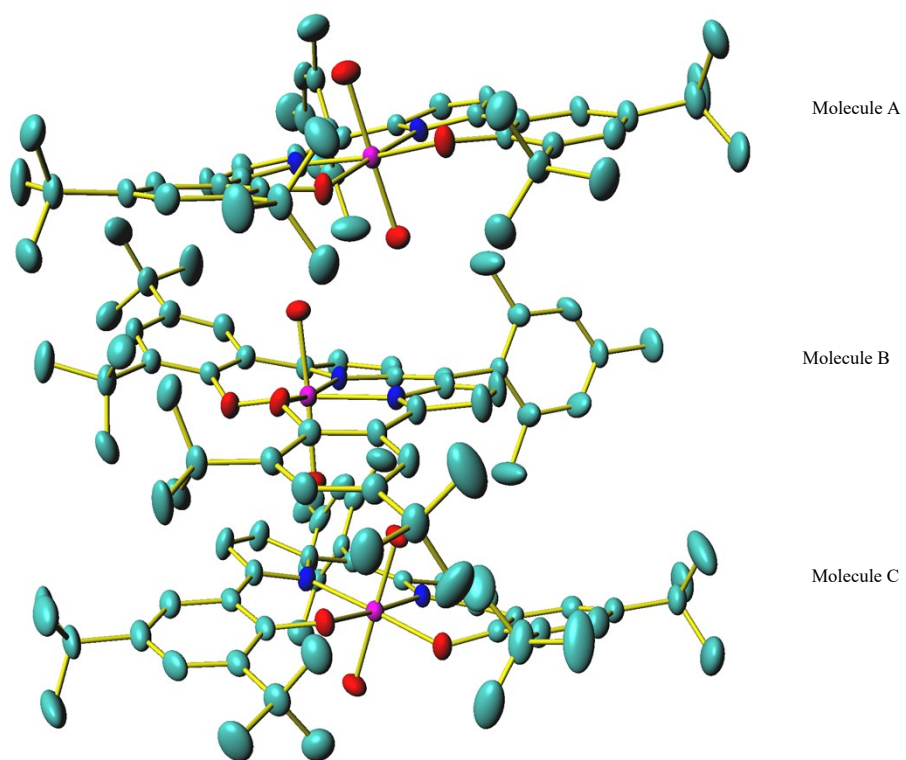

Figure S6. Molecular structures of  $\text{LSb}(\text{OH})_2$ .

Molecule A

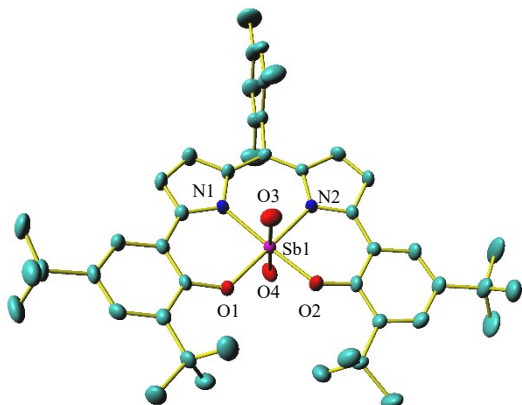

Selected bond lengths (Å) and angles (°)  
Sb1-O1 1.974(2), Sb1-O2 1.972(2), Sb1-N1  
2.084(3), Sb1-N2 2.084(2), Sb1-O3 1.953(2),  
Sb1-O4 1.921(2), O3-Sb1-O4 178.6(1)

Molecule B

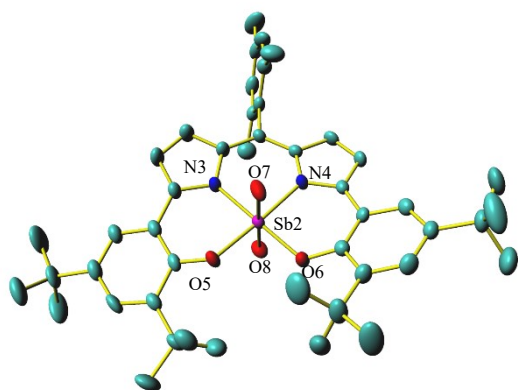

Selected bond lengths (Å) and angles (°)  
Sb2-O5 1.977(2), Sb2-O6 1.982(2), Sb2-N3  
2.070(2), Sb2-N4 2.076(3), Sb2-O7 1.955(2),  
Sb2-O8 1.955(2), O7-Sb2-O8 176.7(1)

Molecule C

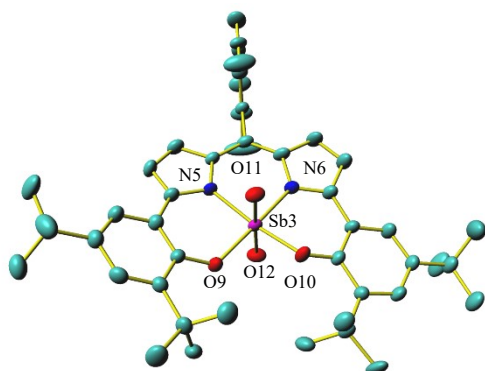

Selected bond lengths (Å) and angles (°)  
Sb3-O9 1.980(2), Sb3-O10 1.973(2), Sb3-N5  
2.093(2), Sb3-N6 2.089(3), Sb3-O11 1.928(2),  
Sb3-O12 1.943(2), O11-Sb3-O12 178.5(1)

Figure S7. Independent molecules of **LSb(OH)<sub>2</sub>**.

### DFT calculations

Density functional theory (DFT) calculations were performed using the Gaussian 16 (revision C.02) program package.<sup>S4</sup> CAM-B3LYP density functional with the 6-311G(d) and 6-311+G(d) basis sets were employed to the geometry optimizations and the time-dependent (TD)-DFT calculations. The M06 density functional was also employed for the TD-DFT calculations. Solvent effects were included by the IEFPCM method in the TD-DFT calculations. For the Sb atoms, the SDD basis set and pseudo potential was used. The optimized geometries were confirmed as the local energy minima by the frequency calculations. The computation was performed using Research Center for Computational Science, Okazaki, Japan (Project: 22-IMS-C164, and 23-IMS-C170, T.A.). Optimized geometries (in Å) of the Sb complexes are shown below.

### LSbCl<sub>2</sub>

|    |          |          |          |
|----|----------|----------|----------|
| Sb | -0.00397 | -0.2335  | 0.008611 |
| Cl | 0.363188 | -0.2459  | -2.36648 |
| Cl | -0.37385 | -0.1845  | 2.382954 |
| O  | 1.314481 | -1.63022 | 0.316957 |
| O  | -1.39336 | -1.56788 | -0.27176 |
| N  | 1.477074 | 1.204203 | 0.153418 |
| C  | 2.665803 | -1.60303 | 0.201564 |
| C  | -2.74141 | -1.46572 | -0.1858  |
| C  | 3.499961 | 2.158142 | 0.332597 |
| H  | 4.566917 | 2.2734   | 0.436581 |
| C  | -3.41307 | -0.23003 | -0.17053 |
| C  | 3.3375   | -2.84629 | 0.17679  |
| C  | -4.81922 | -0.2188  | -0.07697 |
| H  | -5.31863 | 0.737292 | -0.03272 |
| C  | 3.399742 | -0.4003  | 0.158172 |
| C  | 4.796602 | -0.46456 | 0.035585 |
| H  | 5.348417 | 0.463537 | -0.03427 |
| C  | 4.724003 | -2.82805 | 0.066039 |
| H  | 5.239256 | -3.77573 | 0.039574 |
| C  | -3.38393 | 2.330106 | -0.33986 |
| H  | -4.44359 | 2.499887 | -0.44279 |
| C  | 1.296983 | 2.589419 | 0.159848 |

|   |          |          |          |
|---|----------|----------|----------|
| C | 0.118549 | 4.753626 | 0.003852 |
| C | -4.85756 | -2.58421 | -0.0743  |
| H | -5.42844 | -3.50208 | -0.04462 |
| C | 0.082073 | 3.256142 | -9.1E-05 |
| C | -2.41045 | 3.296276 | -0.29049 |
| H | -2.54408 | 4.367474 | -0.33239 |
| C | 2.803166 | 0.929736 | 0.227131 |
| N | -1.41141 | 1.274404 | -0.16072 |
| C | 2.582562 | -4.18033 | 0.294135 |
| C | -0.20114 | 4.714486 | 2.521431 |
| H | -1.10363 | 4.095194 | 2.511458 |
| H | -0.28412 | 5.418447 | 3.352764 |
| H | 0.638647 | 4.04392  | 2.728699 |
| C | 2.575214 | 3.172766 | 0.287012 |
| H | 2.762252 | 4.235816 | 0.331287 |
| C | -0.01699 | 5.447169 | 1.216223 |
| C | 5.485997 | -1.65951 | -0.01824 |
| C | -5.56444 | -1.37385 | -0.02194 |
| C | 0.283461 | 5.447096 | -1.20484 |
| C | 0.310778 | 6.839564 | -1.17618 |
| H | 0.434776 | 7.379552 | -2.1115  |
| C | -2.7494  | 1.066602 | -0.23622 |
| C | 0.182732 | 7.554161 | 0.011757 |
| C | 0.016746 | 6.839593 | 1.195042 |
| H | -0.09172 | 7.379616 | 2.132267 |
| C | 3.52954  | -5.38891 | 0.233179 |
| H | 2.937257 | -6.30465 | 0.322846 |
| H | 4.256892 | -5.39002 | 1.051495 |
| H | 4.073214 | -5.44266 | -0.7158  |
| C | -1.16206 | 2.649653 | -0.16279 |
| C | 0.246726 | 9.05937  | 0.019752 |
| H | 1.27766  | 9.408586 | 0.150131 |
| H | -0.34528 | 9.480064 | 0.837392 |
| H | -0.12316 | 9.479976 | -0.91953 |
| C | -3.47755 | -2.67781 | -0.15727 |

|   |          |          |          |
|---|----------|----------|----------|
| C | 1.585791 | -4.33439 | -0.86813 |
| H | 2.111288 | -4.32388 | -1.8291  |
| H | 0.843327 | -3.53947 | -0.87671 |
| H | 1.060695 | -5.29215 | -0.78249 |
| C | -2.05529 | -4.16718 | -1.59502 |
| H | -2.77066 | -4.11266 | -2.42279 |
| H | -1.54122 | -5.13249 | -1.65828 |
| H | -1.3173  | -3.37746 | -1.73089 |
| C | 0.425679 | 4.714369 | -2.51525 |
| H | 1.290917 | 4.044023 | -2.50927 |
| H | 0.549856 | 5.418273 | -3.34149 |
| H | -0.45138 | 4.095038 | -2.72773 |
| C | -2.78885 | -4.04907 | -0.24514 |
| C | -1.81514 | -4.23789 | 0.931736 |
| H | -1.03143 | -3.48359 | 0.939296 |
| H | -1.3409  | -5.22329 | 0.865888 |
| H | -2.35095 | -4.18601 | 1.885645 |
| C | 7.013028 | -1.66501 | -0.1636  |
| C | -3.79715 | -5.20668 | -0.17965 |
| H | -4.35557 | -5.21728 | 0.762266 |
| H | -3.25156 | -6.15278 | -0.24696 |
| H | -4.51222 | -5.18366 | -1.00844 |
| C | -7.50782 | -2.1188  | 1.377234 |
| H | -7.1513  | -3.15287 | 1.390419 |
| H | -8.59944 | -2.14231 | 1.467148 |
| H | -7.10361 | -1.61509 | 2.261021 |
| C | 1.859486 | -4.24383 | 1.653368 |
| H | 1.300713 | -5.18254 | 1.736202 |
| H | 1.161688 | -3.41769 | 1.785156 |
| H | 2.585709 | -4.21197 | 2.472845 |
| C | -7.09235 | -1.38606 | 0.088821 |
| C | -7.68078 | 0.029067 | 0.133479 |
| H | -7.31678 | 0.593848 | 0.997967 |
| H | -8.77088 | -0.02782 | 0.212585 |
| H | -7.44579 | 0.596    | -0.7734  |



|   |          |          |          |
|---|----------|----------|----------|
| C | 7.646297 | -0.91654 | 1.023029 |
| H | 7.310494 | 0.123532 | 1.074072 |
| H | 8.737964 | -0.90875 | 0.93083  |
| H | 7.387895 | -1.3972  | 1.971913 |
| C | -7.68994 | -2.11521 | -1.12811 |
| H | -7.41788 | -1.60887 | -2.05974 |
| H | -8.78308 | -2.1385  | -1.0592  |
| H | -7.33991 | -3.14935 | -1.19585 |
| C | 7.405669 | -0.96336 | -1.4762  |
| H | 6.973304 | -1.47867 | -2.33965 |
| H | 8.494943 | -0.95526 | -1.59386 |
| H | 7.060786 | 0.07463  | -1.5013  |
| C | 7.589364 | -3.08593 | -0.19198 |
| H | 7.36988  | -3.63376 | 0.730051 |
| H | 8.677912 | -3.03797 | -0.29573 |
| H | 7.203051 | -3.66591 | -1.03616 |

**LSb(OH)<sub>2</sub>**

|    |          |          |          |
|----|----------|----------|----------|
| Sb | 0.005148 | -0.25586 | -0.00399 |
| O  | -1.32744 | -1.60072 | -0.59199 |
| O  | 1.409947 | -1.53173 | 0.574241 |
| N  | -1.4703  | 1.194815 | -0.22187 |
| C  | -2.65977 | -1.60726 | -0.35365 |
| C  | 2.740808 | -1.4608  | 0.346982 |
| C  | -3.48745 | 2.150674 | -0.4829  |
| H  | -4.55008 | 2.260071 | -0.63321 |
| C  | 3.408335 | -0.22417 | 0.263892 |
| C  | -3.32862 | -2.84871 | -0.27005 |
| C  | 4.803313 | -0.20754 | 0.080289 |
| H  | 5.291317 | 0.751203 | -0.01872 |
| C  | -3.39348 | -0.40542 | -0.26149 |
| C  | -4.78016 | -0.46798 | -0.06727 |
| H  | -5.32474 | 0.461619 | 0.040412 |
| C  | -4.70952 | -2.83353 | -0.09387 |
| H  | -5.22144 | -3.78155 | -0.03002 |

|   |          |          |          |
|---|----------|----------|----------|
| C | 3.365842 | 2.333315 | 0.480614 |
| H | 4.421262 | 2.49977  | 0.628847 |
| C | -1.29287 | 2.577558 | -0.22561 |
| C | -0.12635 | 4.743116 | -0.00203 |
| C | 4.851777 | -2.57457 | 0.098887 |
| H | 5.422337 | -3.4912  | 0.033775 |
| C | -0.08679 | 3.244998 | -0.00071 |
| C | 2.391451 | 3.296975 | 0.404658 |
| H | 2.519239 | 4.36832  | 0.460498 |
| C | -2.79058 | 0.924155 | -0.34061 |
| N | 1.402004 | 1.270005 | 0.223337 |
| C | -2.56818 | -4.18122 | -0.36027 |
| C | 0.311314 | 4.71466  | -2.50091 |
| H | 1.209227 | 4.091103 | -2.44675 |
| H | 0.439005 | 5.42163  | -3.32417 |
| H | -0.5208  | 4.049302 | -2.75144 |
| C | -2.56513 | 3.165611 | -0.40703 |
| H | -2.74959 | 4.228554 | -0.46443 |
| C | 0.064564 | 5.44244  | -1.20343 |
| C | -5.46708 | -1.66506 | 0.016601 |
| C | 5.549668 | -1.36286 | -0.00182 |
| C | -0.34967 | 5.433649 | 1.198836 |
| C | -0.37895 | 6.82621  | 1.174019 |
| H | -0.54843 | 7.36262  | 2.104347 |
| C | 2.734772 | 1.069944 | 0.340626 |
| C | -0.19657 | 7.545346 | -0.0039  |
| C | 0.026844 | 6.8348   | -1.17999 |
| H | 0.178477 | 7.378013 | -2.10945 |
| C | -3.50069 | -5.39505 | -0.22853 |
| H | -2.90295 | -6.30955 | -0.29386 |
| H | -4.24678 | -5.43411 | -1.02894 |
| H | -4.02315 | -5.41375 | 0.733363 |
| C | 1.151112 | 2.641977 | 0.224875 |
| C | -0.26378 | 9.050531 | -0.01005 |
| H | -1.28813 | 9.398459 | -0.18764 |

|   |          |          |          |
|---|----------|----------|----------|
| H | 0.365253 | 9.475328 | -0.79745 |
| H | 0.060659 | 9.468857 | 0.94696  |
| C | 3.477999 | -2.66876 | 0.26384  |
| C | -1.54898 | -4.26999 | 0.78975  |
| H | -2.06278 | -4.24394 | 1.756785 |
| H | -0.83366 | -3.44999 | 0.759347 |
| H | -0.99241 | -5.21169 | 0.729167 |
| C | 2.088506 | -4.20392 | 1.705582 |
| H | 2.819689 | -4.1527  | 2.51978  |
| H | 1.594573 | -5.18045 | 1.758784 |
| H | 1.337641 | -3.4321  | 1.868307 |
| C | -0.55156 | 4.696418 | 2.498741 |
| H | -1.40993 | 4.019348 | 2.446541 |
| H | -0.72215 | 5.396977 | 3.319702 |
| H | 0.319402 | 4.083654 | 2.751526 |
| C | 2.789416 | -4.04003 | 0.343873 |
| C | 1.783282 | -4.17898 | -0.81276 |
| H | 1.024032 | -3.39945 | -0.78377 |
| H | 1.278659 | -5.14987 | -0.75903 |
| H | 2.300719 | -4.12113 | -1.77646 |
| C | -6.98574 | -1.6697  | 0.232796 |
| C | 3.787599 | -5.20044 | 0.212969 |
| H | 4.316082 | -5.18583 | -0.74575 |
| H | 3.240556 | -6.14659 | 0.270521 |
| H | 4.529561 | -5.20214 | 1.018205 |
| C | 7.411574 | -2.10981 | -1.5094  |
| H | 7.059317 | -3.14536 | -1.49544 |
| H | 8.496164 | -2.12934 | -1.66386 |
| H | 6.953281 | -1.61299 | -2.37042 |
| C | -1.86686 | -4.30202 | -1.72629 |
| H | -1.32123 | -5.2503  | -1.78621 |
| H | -1.15984 | -3.48996 | -1.88982 |
| H | -2.60413 | -4.28721 | -2.53647 |
| C | 7.068675 | -1.37107 | -0.20316 |
| C | 7.649098 | 0.04543  | -0.29031 |

|   |          |          |          |
|---|----------|----------|----------|
| H | 7.235847 | 0.602889 | -1.13711 |
| H | 8.733531 | -0.0085  | -0.42881 |
| H | 7.461418 | 0.618336 | 0.623759 |
| C | -7.67264 | -0.91703 | -0.92093 |
| H | -7.33638 | 0.122099 | -0.98519 |
| H | -8.75893 | -0.90663 | -0.77801 |
| H | -7.46003 | -1.39629 | -1.8819  |
| C | 7.739962 | -2.09106 | 0.980344 |
| H | 7.522339 | -1.57914 | 1.923234 |
| H | 8.827296 | -2.11265 | 0.847143 |
| H | 7.396568 | -3.12531 | 1.075323 |
| C | -7.31758 | -0.97152 | 1.563908 |
| H | -6.84673 | -1.49029 | 2.404914 |
| H | -8.40042 | -0.96212 | 1.731536 |
| H | -6.9697  | 0.065615 | 1.576321 |
| C | -7.56254 | -3.0898  | 0.28329  |
| H | -7.38173 | -3.63655 | -0.64778 |
| H | -8.64585 | -3.04095 | 0.432514 |
| H | -7.14194 | -3.67151 | 1.109719 |
| O | -0.56227 | -0.32059 | 1.840171 |
| H | 0.01871  | -0.93118 | 2.319084 |
| O | 0.576568 | -0.27822 | -1.84798 |
| H | 0.026488 | -0.9136  | -2.33121 |

**LSbCl(OH)**

|    |          |          |          |
|----|----------|----------|----------|
| Sb | 0.017745 | -0.2757  | -0.06969 |
| Cl | -0.65164 | -0.3075  | 2.249064 |
| O  | 1.359703 | -1.64811 | 0.48402  |
| O  | -1.421   | -1.55897 | -0.61785 |
| N  | 1.485399 | 1.191103 | 0.202435 |
| C  | 2.694419 | -1.61245 | 0.271066 |
| C  | -2.75314 | -1.46526 | -0.38643 |
| C  | 3.488942 | 2.154171 | 0.515854 |
| H  | 4.54704  | 2.269753 | 0.690018 |
| C  | -3.40895 | -0.22045 | -0.3574  |

|   |          |          |          |
|---|----------|----------|----------|
| C | 3.376007 | -2.84408 | 0.147592 |
| C | -4.80484 | -0.18985 | -0.18154 |
| H | -5.28907 | 0.773907 | -0.12245 |
| C | 3.417593 | -0.40007 | 0.254598 |
| C | 4.811571 | -0.44543 | 0.101378 |
| H | 5.352776 | 0.490814 | 0.053511 |
| C | 4.760213 | -2.81013 | 0.014111 |
| H | 5.28188  | -3.75052 | -0.07858 |
| C | -3.34536 | 2.332381 | -0.62304 |
| H | -4.39685 | 2.503713 | -0.7922  |
| C | 1.298176 | 2.574288 | 0.204262 |
| C | 0.136311 | 4.736435 | -0.04553 |
| C | -4.86634 | -2.5573  | -0.10288 |
| H | -5.44251 | -3.46711 | -0.00268 |
| C | 0.098929 | 3.238299 | -0.0532  |
| C | -2.36798 | 3.293562 | -0.52793 |
| H | -2.49136 | 4.365022 | -0.5904  |
| C | 2.804349 | 0.922855 | 0.347393 |
| N | -1.39285 | 1.265973 | -0.3171  |
| C | 2.62122  | -4.18273 | 0.1645   |
| C | -0.37278 | 4.697164 | 2.440338 |
| H | -1.26294 | 4.065794 | 2.356926 |
| H | -0.5333  | 5.401171 | 3.260257 |
| H | 0.456272 | 4.038612 | 2.717645 |
| C | 2.5645   | 3.164354 | 0.423042 |
| H | 2.74334  | 4.227635 | 0.490626 |
| C | -0.09082 | 5.430139 | 1.152945 |
| C | 5.510992 | -1.63143 | -0.01525 |
| C | -5.55692 | -1.33794 | -0.05717 |
| C | 0.39276  | 5.431427 | -1.23714 |
| C | 0.418376 | 6.82389  | -1.20618 |
| H | 0.613378 | 7.364237 | -2.12916 |
| C | -2.72594 | 1.068647 | -0.45931 |
| C | 0.200676 | 7.538031 | -0.03116 |
| C | -0.05512 | 6.822635 | 1.135401 |

|   |          |          |          |
|---|----------|----------|----------|
| H | -0.23459 | 7.362046 | 2.062054 |
| C | 3.562646 | -5.38247 | -0.02134 |
| H | 2.969369 | -6.30212 | -0.01424 |
| H | 4.2973   | -5.46227 | 0.786498 |
| H | 4.098685 | -5.34543 | -0.97544 |
| C | -1.13558 | 2.636657 | -0.31547 |
| C | 0.264479 | 9.043253 | -0.01737 |
| H | 1.282382 | 9.392218 | 0.192209 |
| H | -0.38863 | 9.46375  | 0.752499 |
| H | -0.03194 | 9.464598 | -0.98207 |
| C | -3.49234 | -2.66602 | -0.25701 |
| C | 1.609519 | -4.22553 | -0.99597 |
| H | 2.130673 | -4.17344 | -1.95819 |
| H | 0.899302 | -3.40202 | -0.94699 |
| H | 1.046203 | -5.16472 | -0.96854 |
| C | -2.13834 | -4.26277 | -1.6599  |
| H | -2.88469 | -4.23563 | -2.46143 |
| H | -1.6535  | -5.2449  | -1.68545 |
| H | -1.3831  | -3.50539 | -1.86648 |
| C | 0.634604 | 4.699545 | -2.53331 |
| H | 1.499155 | 4.032039 | -2.462   |
| H | 0.817814 | 5.40397  | -3.34815 |
| H | -0.22284 | 4.077857 | -2.80944 |
| C | -2.80871 | -4.04219 | -0.29063 |
| C | -1.77543 | -4.14387 | 0.845983 |
| H | -1.00695 | -3.37711 | 0.770762 |
| H | -1.28449 | -5.12282 | 0.817424 |
| H | -2.26483 | -4.04058 | 1.820083 |
| C | 7.035963 | -1.61489 | -0.1812  |
| C | -3.81054 | -5.18963 | -0.09142 |
| H | -4.32463 | -5.12608 | 0.873088 |
| H | -3.26858 | -6.14007 | -0.1114  |
| H | -4.5639  | -5.22665 | -0.88521 |
| C | -7.43    | -2.01131 | 1.470352 |
| H | -7.08457 | -3.04872 | 1.50121  |

|   |          |          |          |
|---|----------|----------|----------|
| H | -8.51536 | -2.01749 | 1.619875 |
| H | -6.97261 | -1.48217 | 2.312308 |
| C | 1.914514 | -4.37054 | 1.520666 |
| H | 1.36628  | -5.31936 | 1.528389 |
| H | 1.212186 | -3.5649  | 1.730165 |
| H | 2.65087  | -4.40271 | 2.331077 |
| C | -7.07701 | -1.32948 | 0.136142 |
| C | -7.65013 | 0.092441 | 0.160815 |
| H | -7.23931 | 0.682426 | 0.986491 |
| H | -8.73554 | 0.049591 | 0.294855 |
| H | -7.45445 | 0.625973 | -0.77518 |
| C | 7.677795 | -0.9116  | 1.028273 |
| H | 7.331189 | 0.121253 | 1.128934 |
| H | 8.768065 | -0.88738 | 0.922369 |
| H | 7.437269 | -1.4359  | 1.958576 |
| C | -7.74542 | -2.09489 | -1.02021 |
| H | -7.52018 | -1.62408 | -1.98255 |
| H | -8.83344 | -2.1049  | -0.89208 |
| H | -7.40762 | -3.13412 | -1.06983 |
| C | 7.405361 | -0.85371 | -1.46711 |
| H | 6.966756 | -1.33613 | -2.34633 |
| H | 8.492966 | -0.82931 | -1.59809 |
| H | 7.049867 | 0.180705 | -1.44334 |
| C | 7.626196 | -3.02711 | -0.27764 |
| H | 7.419282 | -3.61756 | 0.620687 |
| H | 8.71338  | -2.96361 | -0.38786 |
| H | 7.238566 | -3.57298 | -1.14371 |
| O | 0.569279 | -0.31573 | -1.95613 |
| H | -0.01604 | -0.92026 | -2.43851 |

**Table S2.** Summary of the DFT calculation data

|                                          | <b>LSbCl<sub>2</sub></b> | <b>LSb(OH)<sub>2</sub></b> | <b>LSbCl(OH)</b>       |
|------------------------------------------|--------------------------|----------------------------|------------------------|
| Sb-X (Å)                                 | 2.403, 2.403             | 1.931, 1.931               | 2.413 (Cl), 1.966 (OH) |
| Sb-N (Å)                                 | 2.070, 2.069             | 2.081, 2.081               | 2.104, 2.096           |
| Sb-O (Å)                                 | 1.947, 1.945             | 1.982, 1.984               | 2.004, 1.997           |
| X-Sb-X (°)                               | 179.12                   | 177.41                     | 178.07                 |
| $\lambda_{\text{max}}$ (nm) <sup>a</sup> | 523                      | 505                        | 509                    |
| Oscillator strength <sup>a</sup>         | 0.5446                   | 0.6071                     | 0.5620                 |
| $\lambda_{\text{max}}$ (nm) <sup>b</sup> | 536                      | 521                        | 525                    |
| Oscillator strength <sup>b</sup>         | 0.6993                   | 0.7641                     | 0.7194                 |
| $\lambda_{\text{max}}$ (nm) <sup>c</sup> | 570                      | 551                        | 556                    |
| Oscillator strength <sup>c</sup>         | 0.5928                   | 0.6817                     | 0.6110                 |
| S <sub>1</sub>                           | HOMO-LUMO                | HOMO-LUMO                  | HOMO-LUMO              |

<sup>a</sup> CAM-B3LYP in vacuum. <sup>b</sup> CAM-B3LYP in CHCl<sub>3</sub>. <sup>c</sup> M06 in CHCl<sub>3</sub>.



HOMO (-6.45 eV)

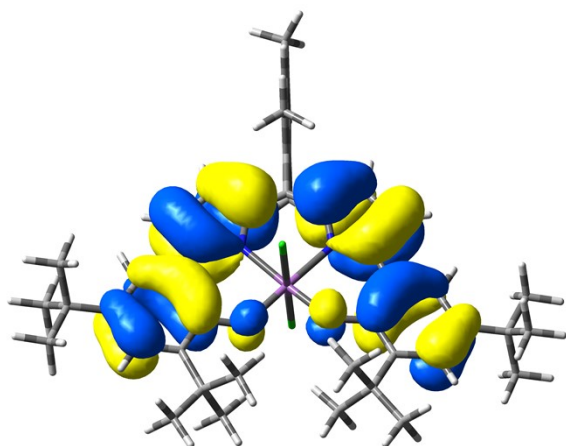

LUMO (-1.99 eV)

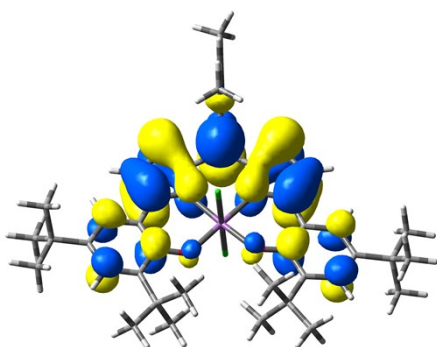

Figure S8. HOMO and LUMO of **LSbCl<sub>2</sub>**

HOMO (-6.51 eV)

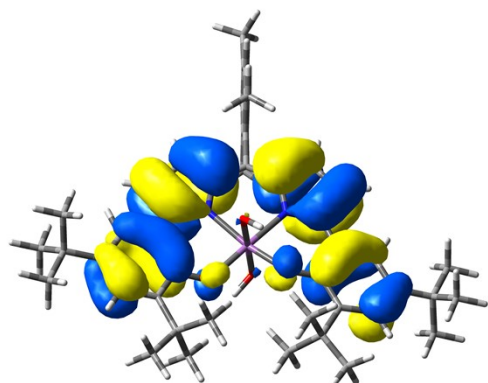

LUMO (-2.00 eV)

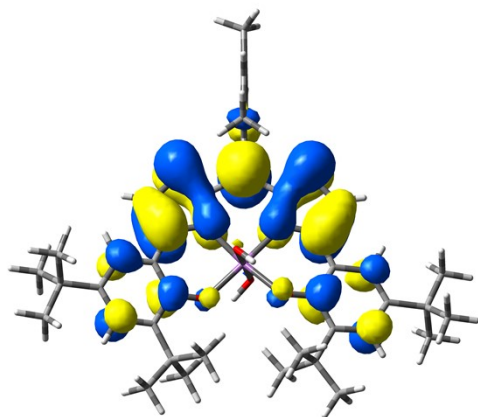

Figure S9. HOMO and LUMO of **LSb(OH)<sub>2</sub>**

HOMO (-6.36 eV)

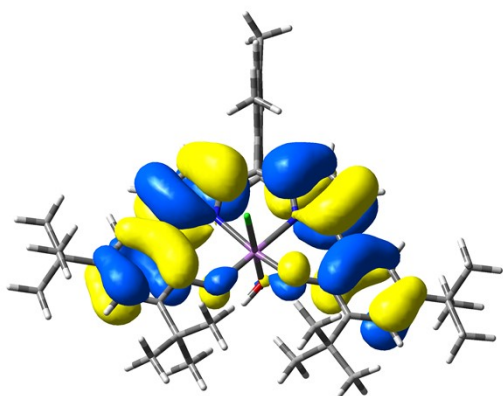

LUMO (-1.84 eV)

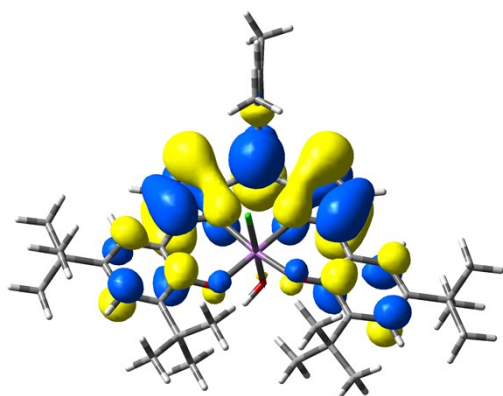

Figure S10. HOMO and LUMO of **LSbCl(OH)**

## PLQY measurement

Photo-luminescence quantum yields (PLQYs) were determined by an absolute fluorescence quantum yield method with a Hamamatsu Photonics absolute PL quantum yield measurement system C9920-02 ( $\lambda_{\text{ex}}$  300 nm).

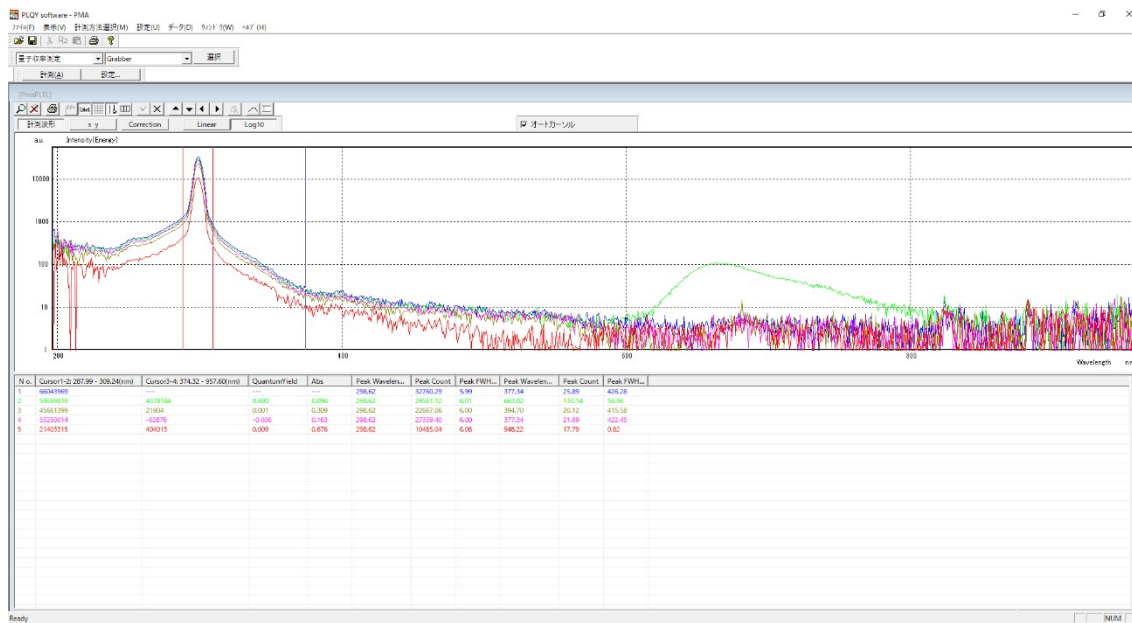

Figure S11. PL spectra of the Sb complexes and LH<sub>3</sub> measured by the PLQY measurement system.

## References

- S1 K. Nakano, K. Kobayashi and K. Nozaki, *J. Am. Chem. Soc.*, 2011, **133**, 10720-10723.
- S2 O. V. Dolomanov, L. J. Bourhis, R. J. Gildea, J. A. K. Howard and H. Puschmann, *J. Appl. Cryst.*, 2009, **42**, 339-341.
- S3 (a) G. M. Sheldrick, *Acta Cryst. A*, 2008, **64**, 112-122; (b) G. M. Sheldrick, *Acta Cryst. C*, 2015, **71**, 3-8
- S4 Gaussian 16, Revision C.02, M. J. Frisch, G. W. Trucks, H. B. Schlegel, G. E. Scuseria, M. A. Robb, J. R. Cheeseman, G. Scalmani, V. Barone, G. A. Petersson, H. Nakatsuji, X. Li, M. Caricato, A. V. Marenich, J. Bloino, B. G. Janesko, R. Gomperts, B. Mennucci, H. P. Hratchian, J. V. Ortiz, A. F. Izmaylov, J. L. Sonnenberg, D. Williams-Young, F. Ding, F. Lipparini, F. Egidi, J. Goings, B. Peng, A. Petrone, T. Henderson, D. Ranasinghe, V. G. Zakrzewski, J. Gao, N. Rega, G. Zheng, W. Liang, M. Hada, M. Ehara, K. Toyota, R. Fukuda, J. Hasegawa, M. Ishida, T. Nakajima, Y. Honda, O. Kitao, H. Nakai, T. Vreven, K. Throssell, J. A. Montgomery, Jr., J. E. Peralta, F. Ogliaro, M. J. Bearpark, J. J. Heyd, E. N. Brothers, K. N. Kudin, V. N. Staroverov, T. A. Keith, R. Kobayashi, J. Normand, K. Raghavachari, A. P. Rendell, J. C. Burant, S. S. Iyengar, J. Tomasi, M. Cossi, J. M. Millam, M. Klene, C. Adamo, R. Cammi, J. W. Ochterski, R. L. Martin, K. Morokuma, O. Farkas, J. B. Foresman, and D. J. Fox, Gaussian, Inc., Wallingford CT, 2019.

# $^1\text{H}$ and $^{13}\text{C}$ NMR spectra and HRMS data of newly synthesized compounds

## LHMe<sub>2</sub>

$^1\text{H}$  NMR (400 MHz,  $\text{CDCl}_3$ )

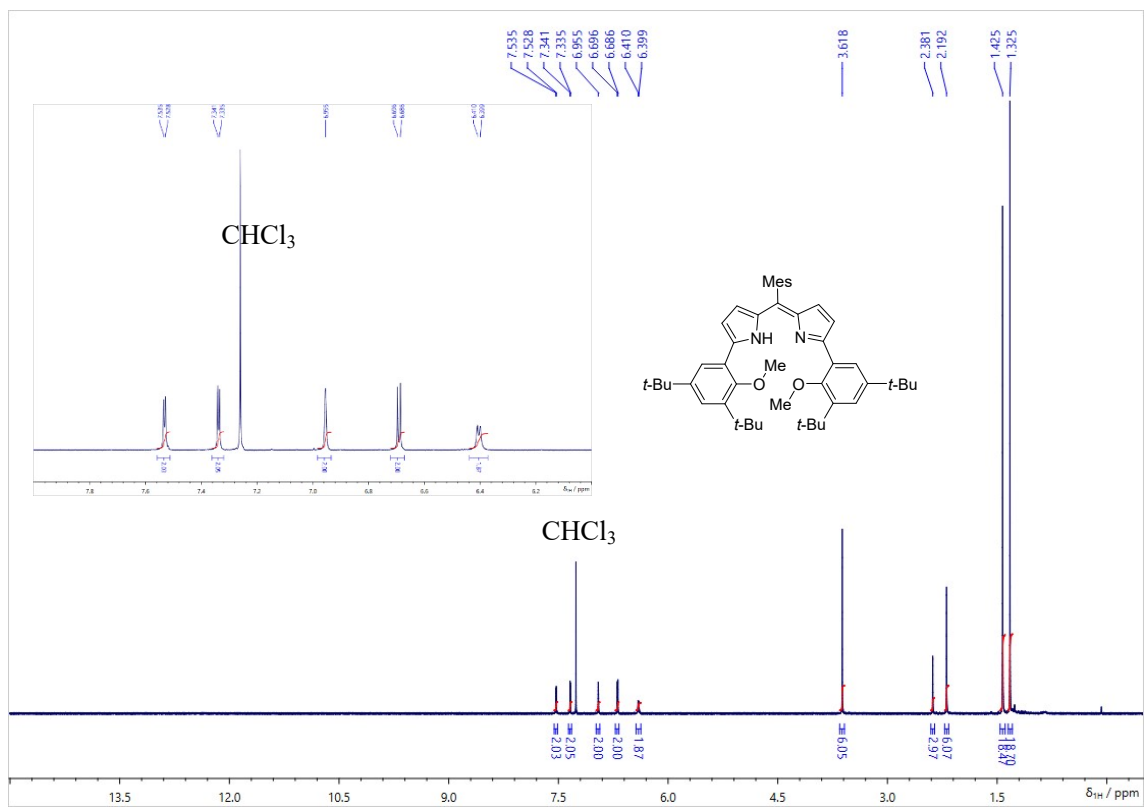

$^{13}\text{C}$  NMR (150 MHz,  $\text{CDCl}_3$ )

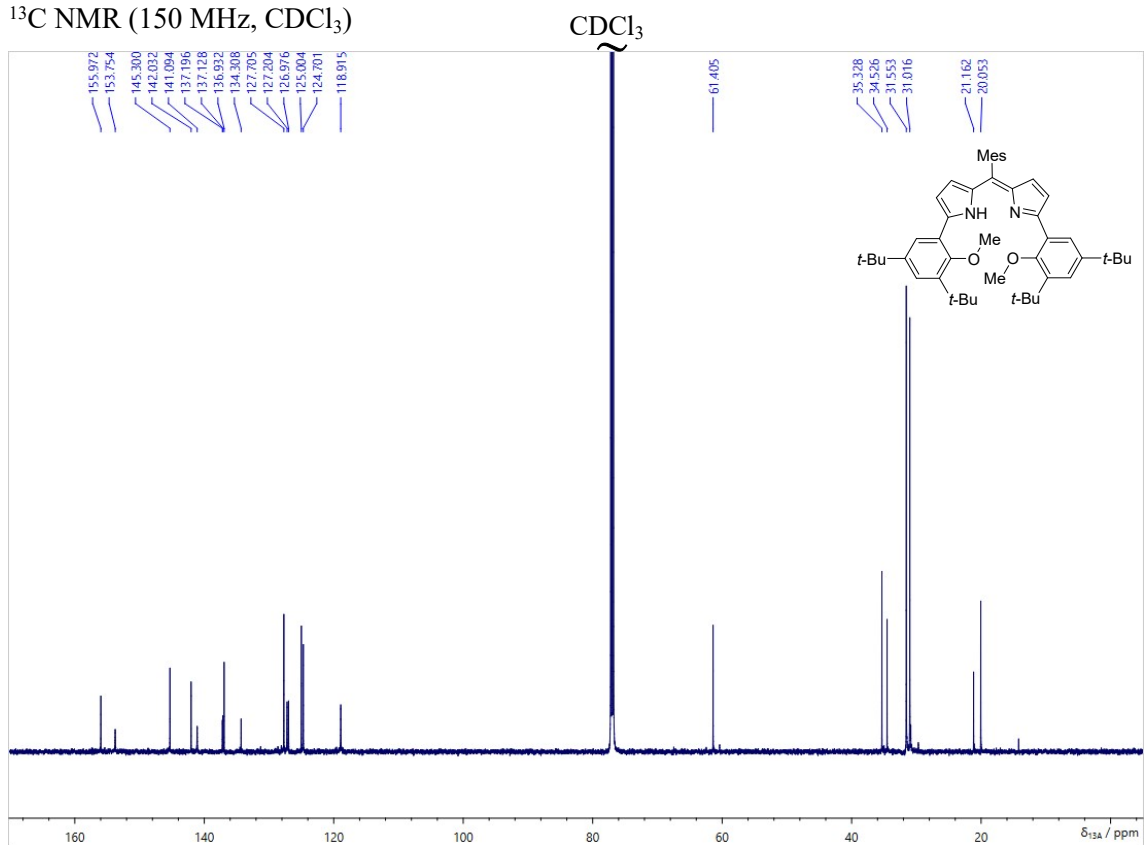

HRMS (APCI-pos, solvent: acetone)

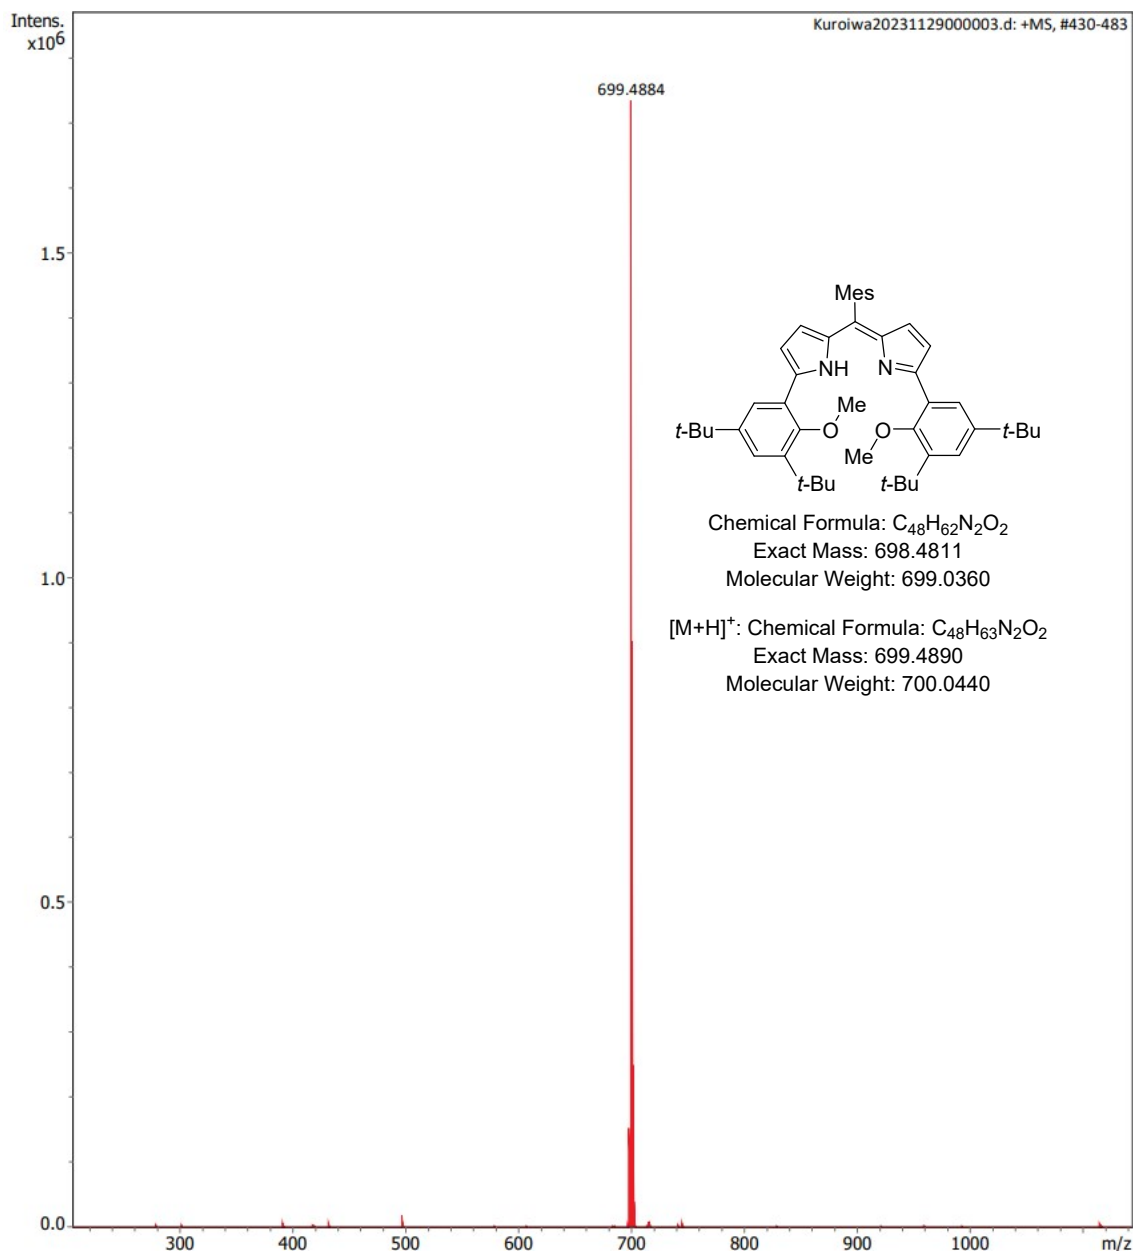



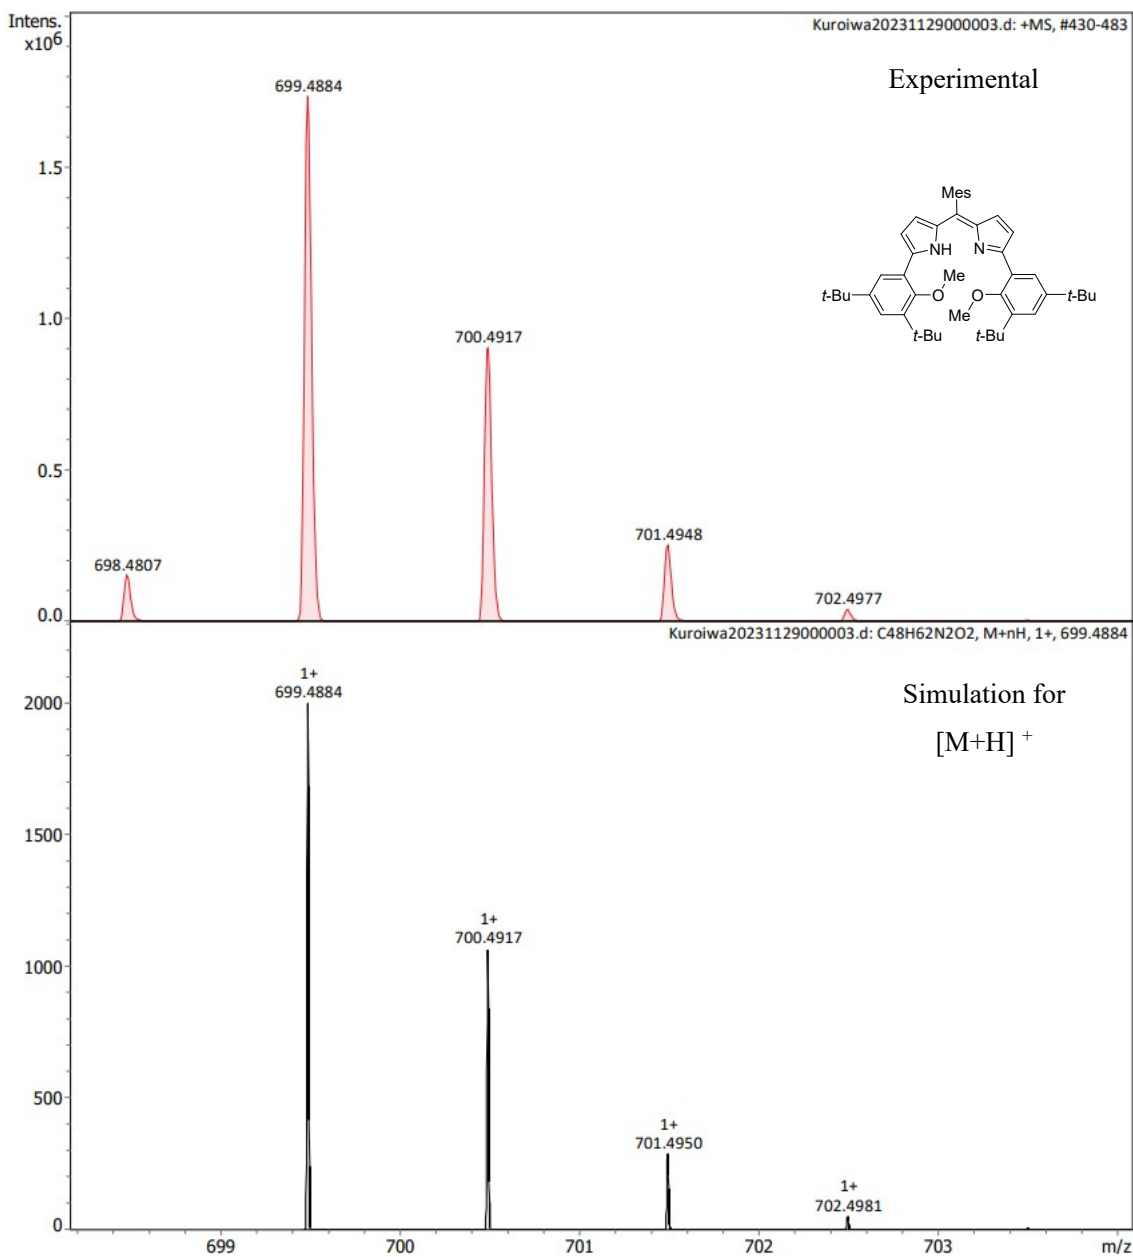

**LH<sub>3</sub>**

<sup>1</sup>H NMR (400 MHz, CDCl<sub>3</sub>)

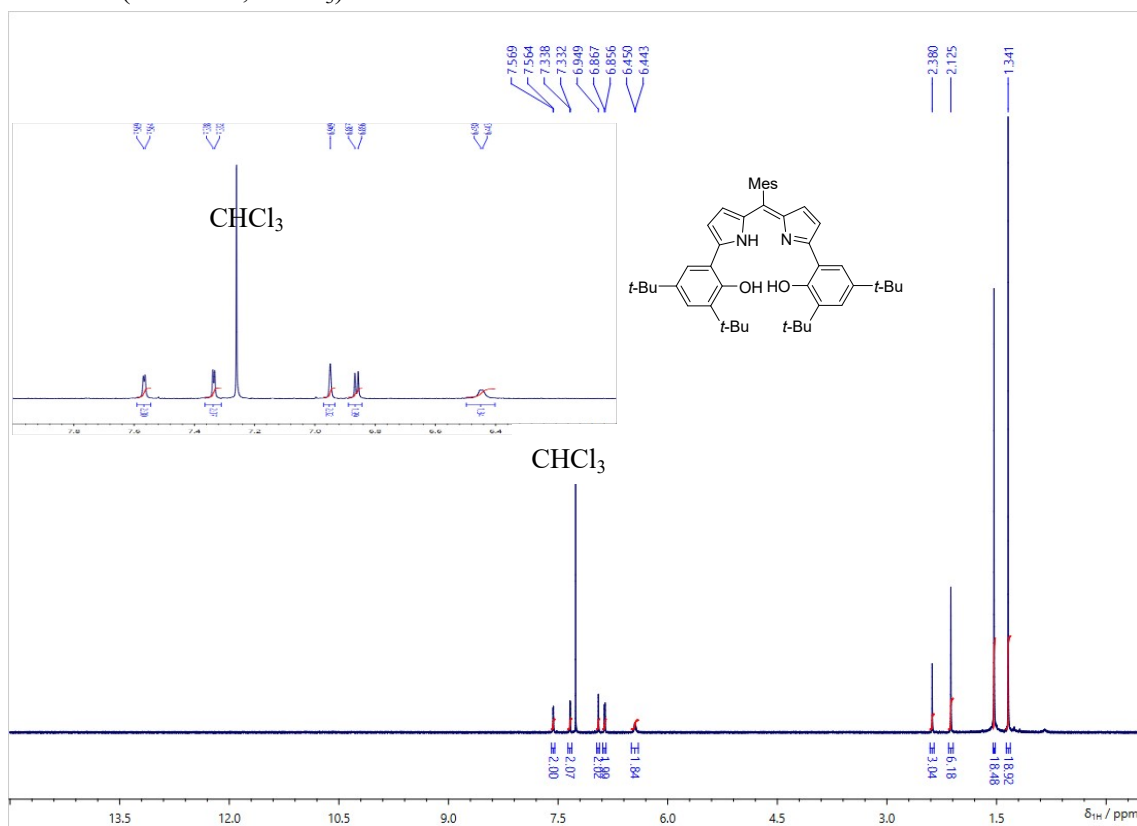

$^{13}\text{C}$  NMR (150 MHz,  $\text{CDCl}_3$ )

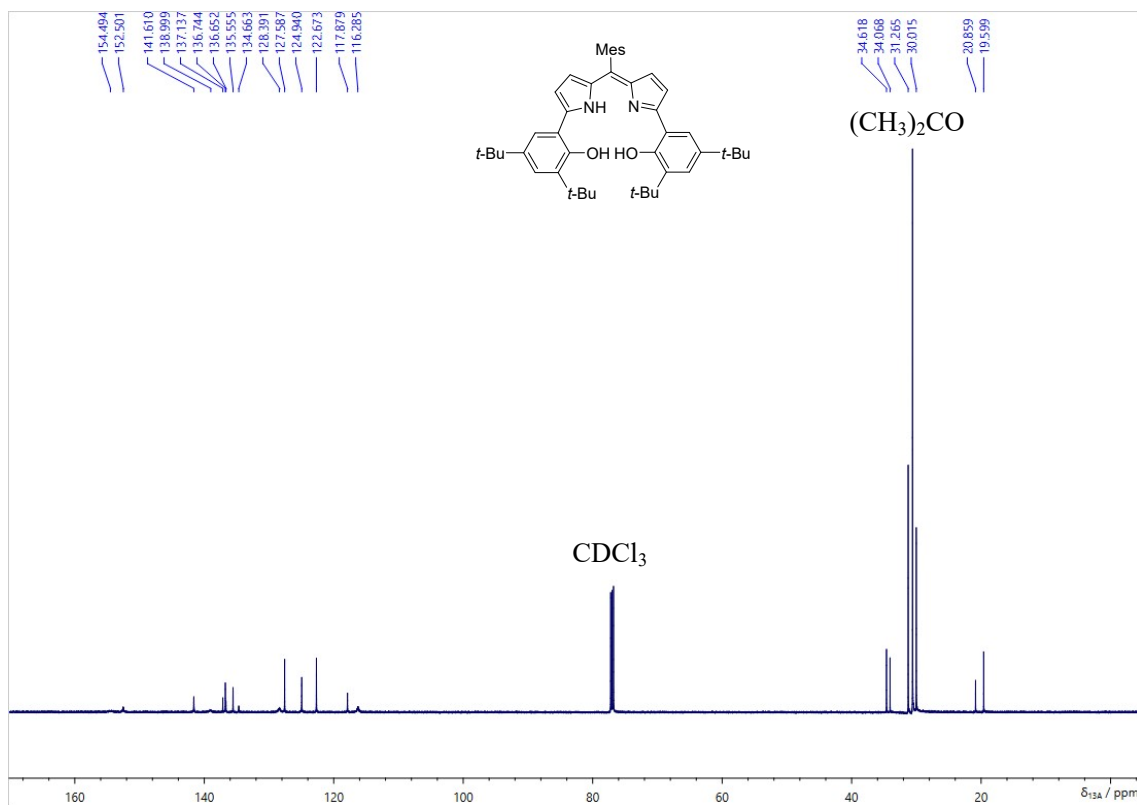

HRMS (APCI-pos, solvent: acetone)

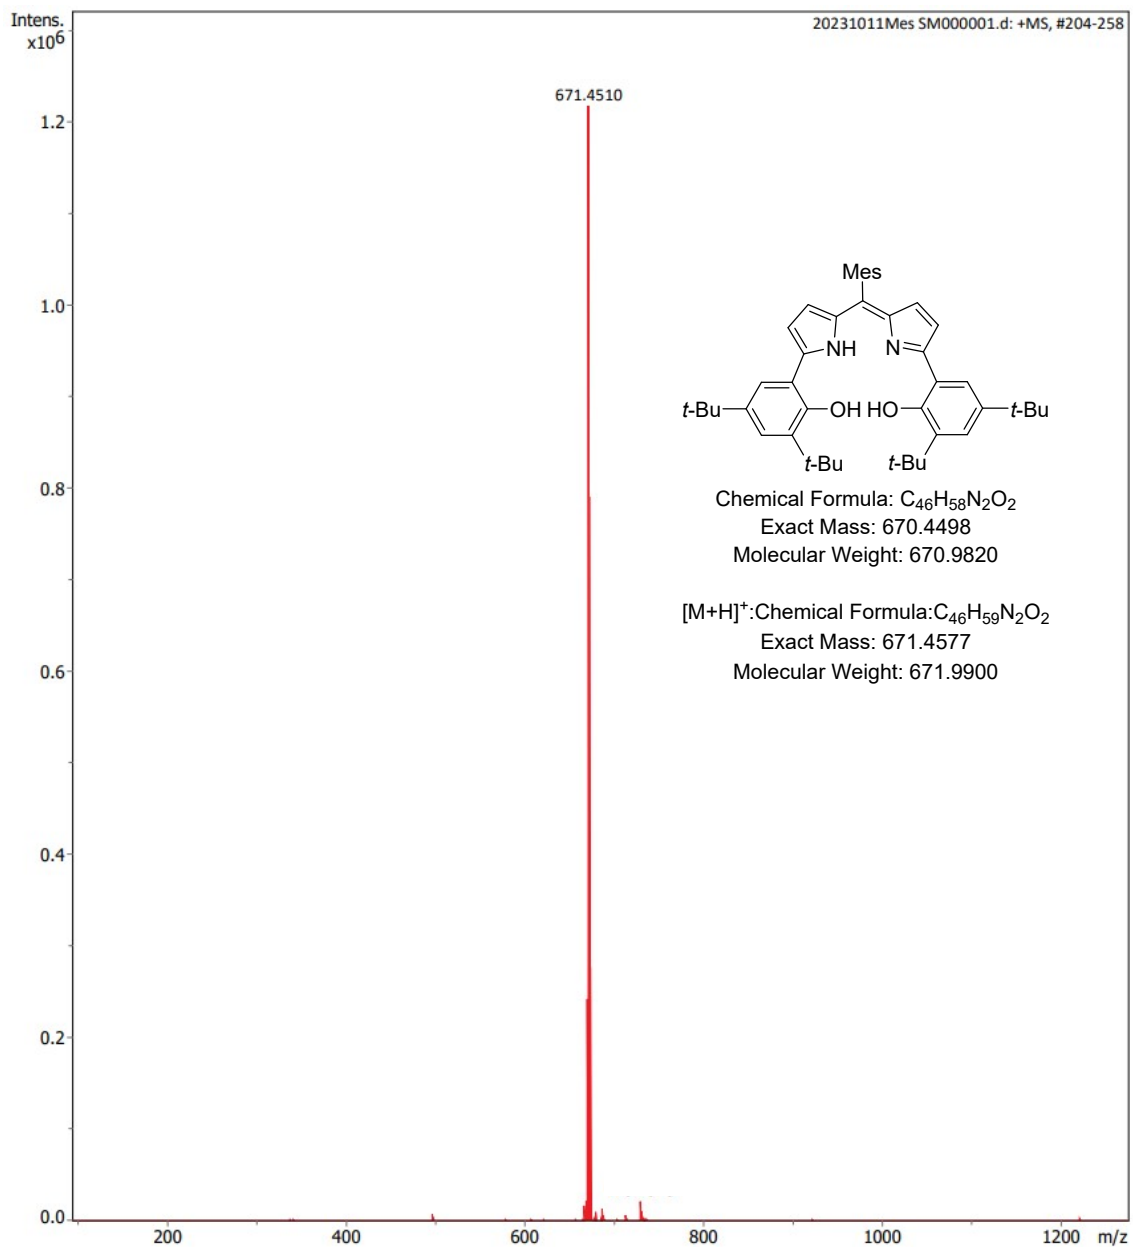

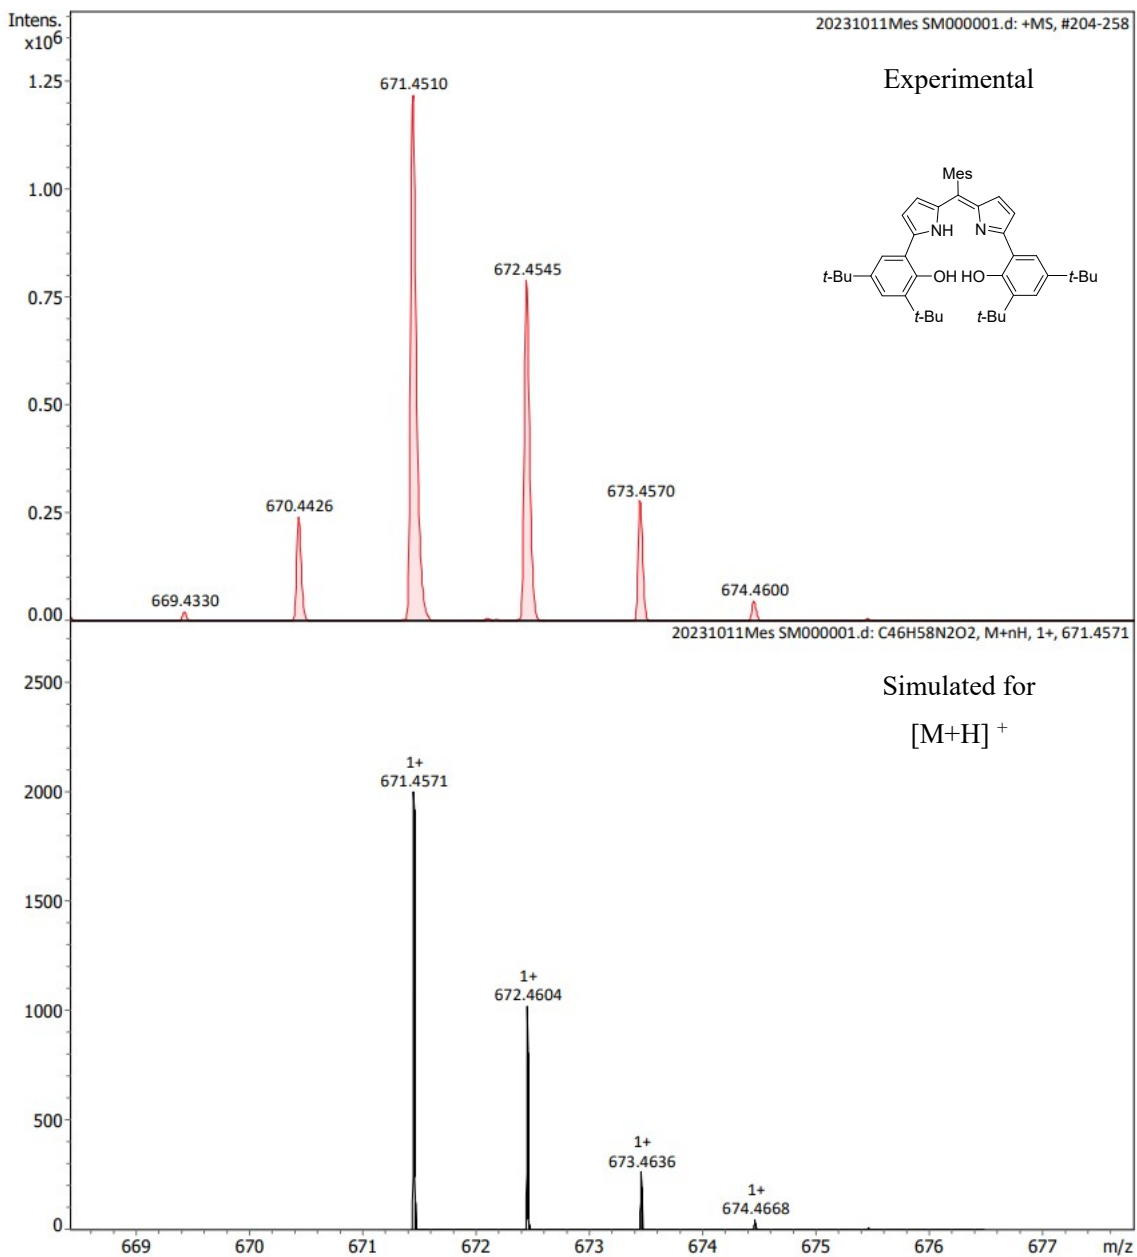

# LSbCl<sub>2</sub>

<sup>1</sup>H NMR (400 MHz, CDCl<sub>3</sub>)

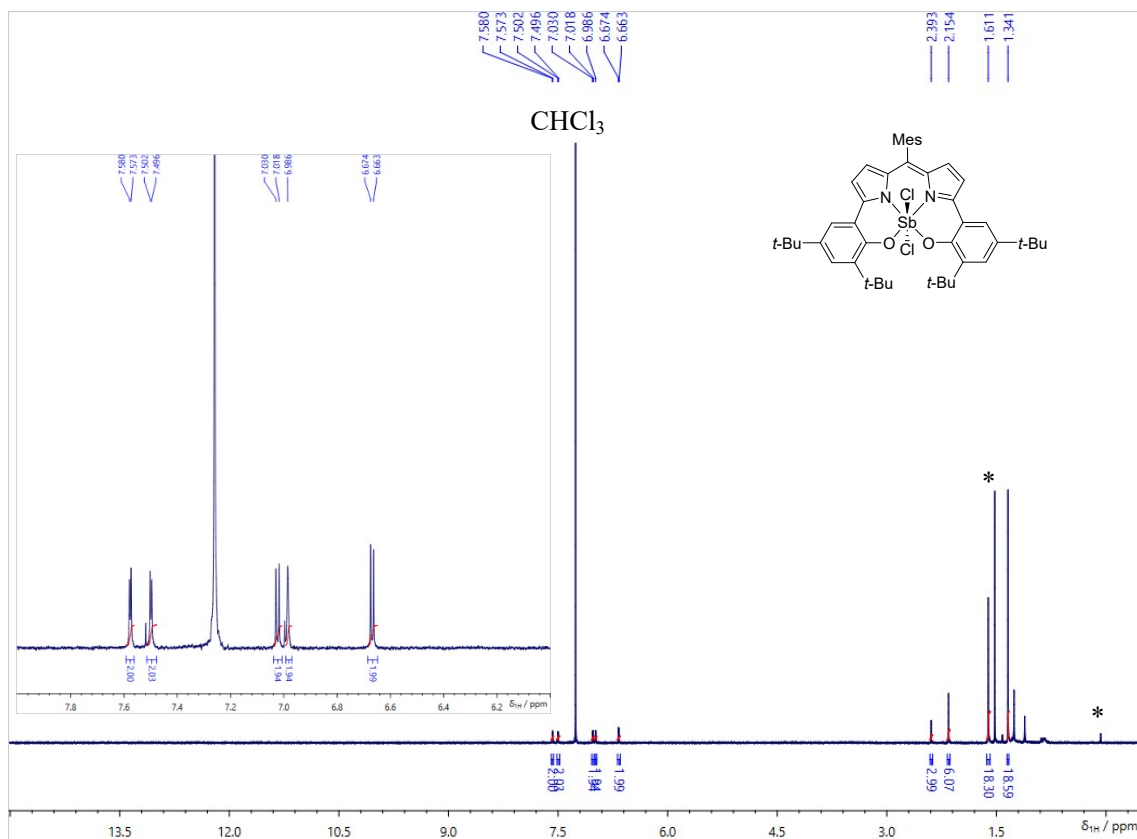

\*Signals corresponding to silicone grease and water.

$^{13}\text{C}$  NMR (150 MHz,  $\text{CDCl}_3$ )

$\text{CDCl}_3$

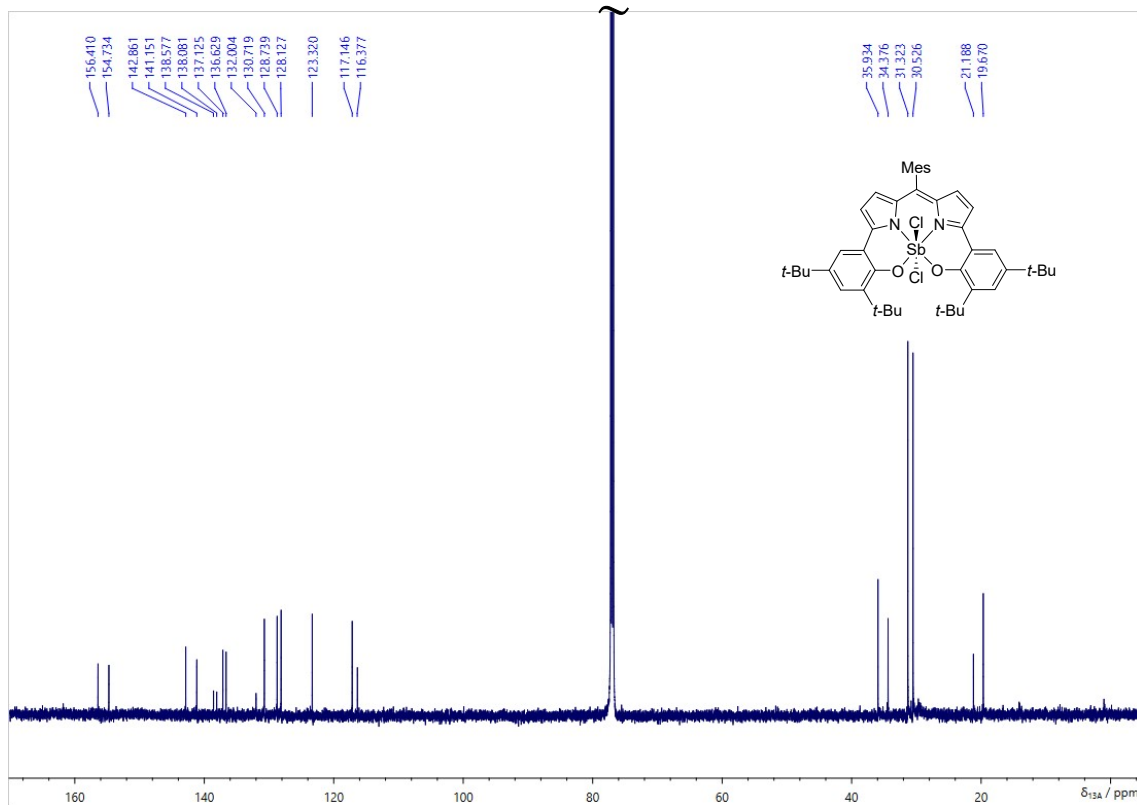

HRMS (APCI-pos, solvent: acetone)

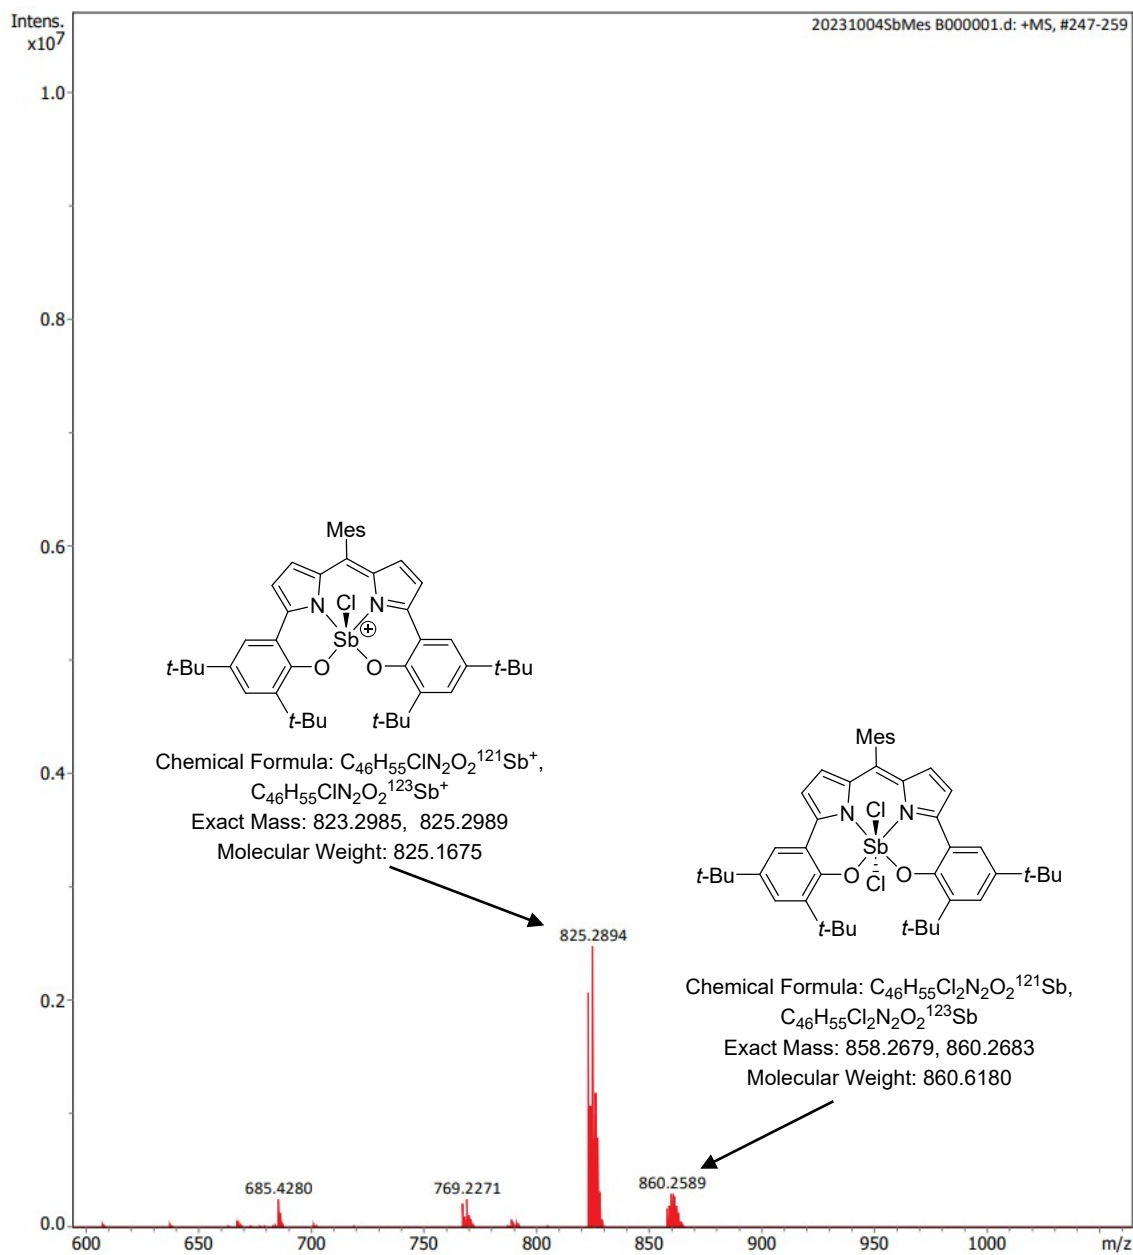



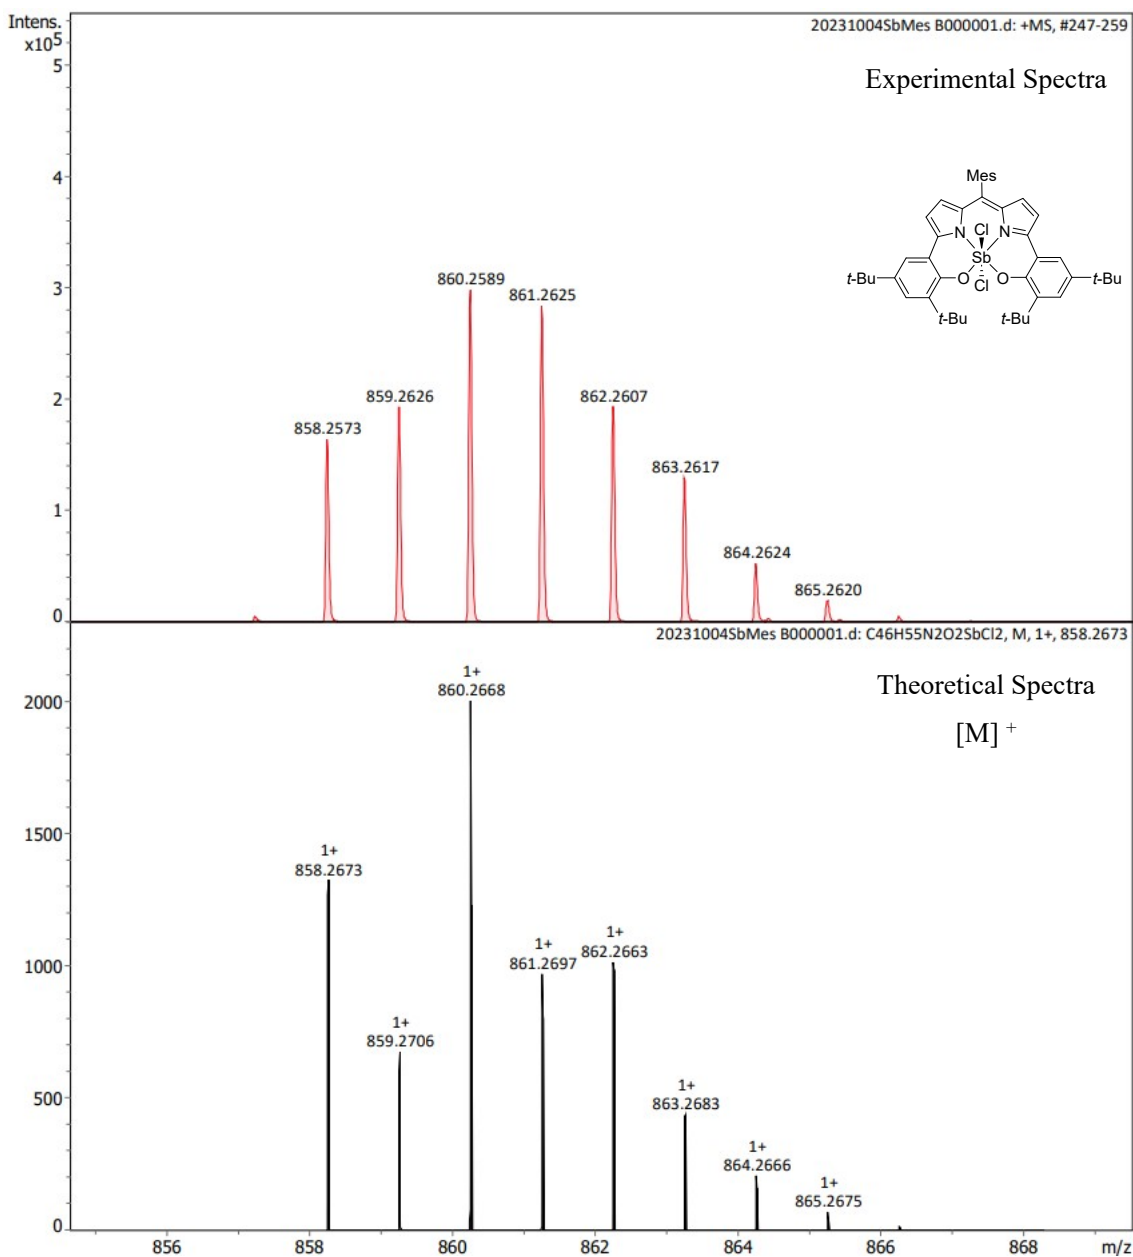

**LSbCl(OH)**

<sup>1</sup>H NMR (400 MHz, CDCl<sub>3</sub>)

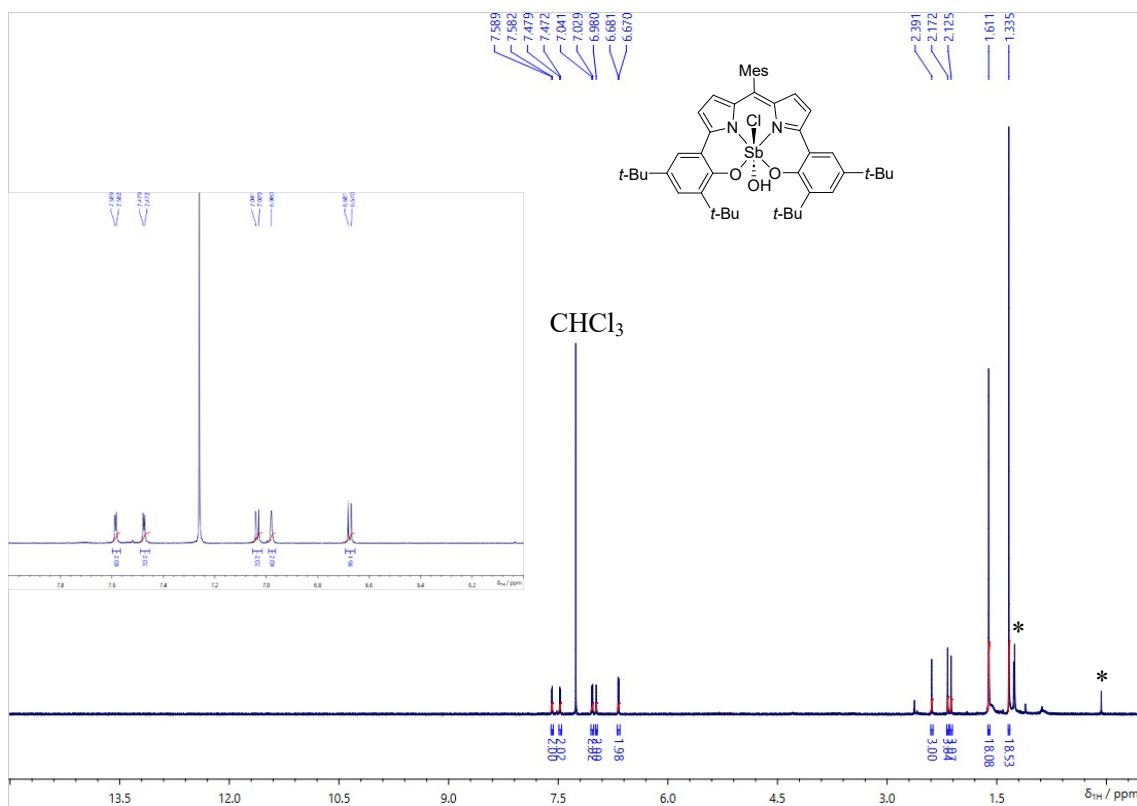

\*Signals corresponding to silicone grease and dioctyl phthalate.

$^{13}\text{C}$  NMR (150 MHz,  $\text{CDCl}_3$ )

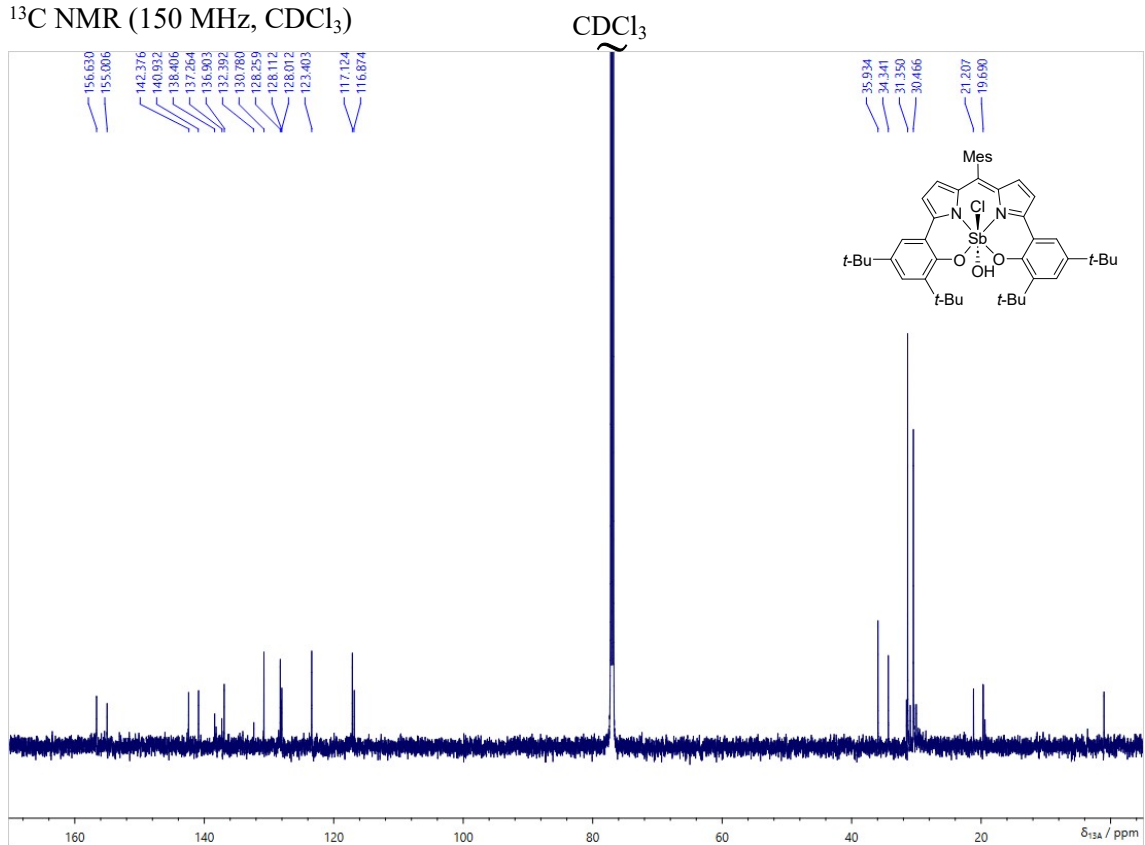

<HRMS (APCI-pos in Acetone)>

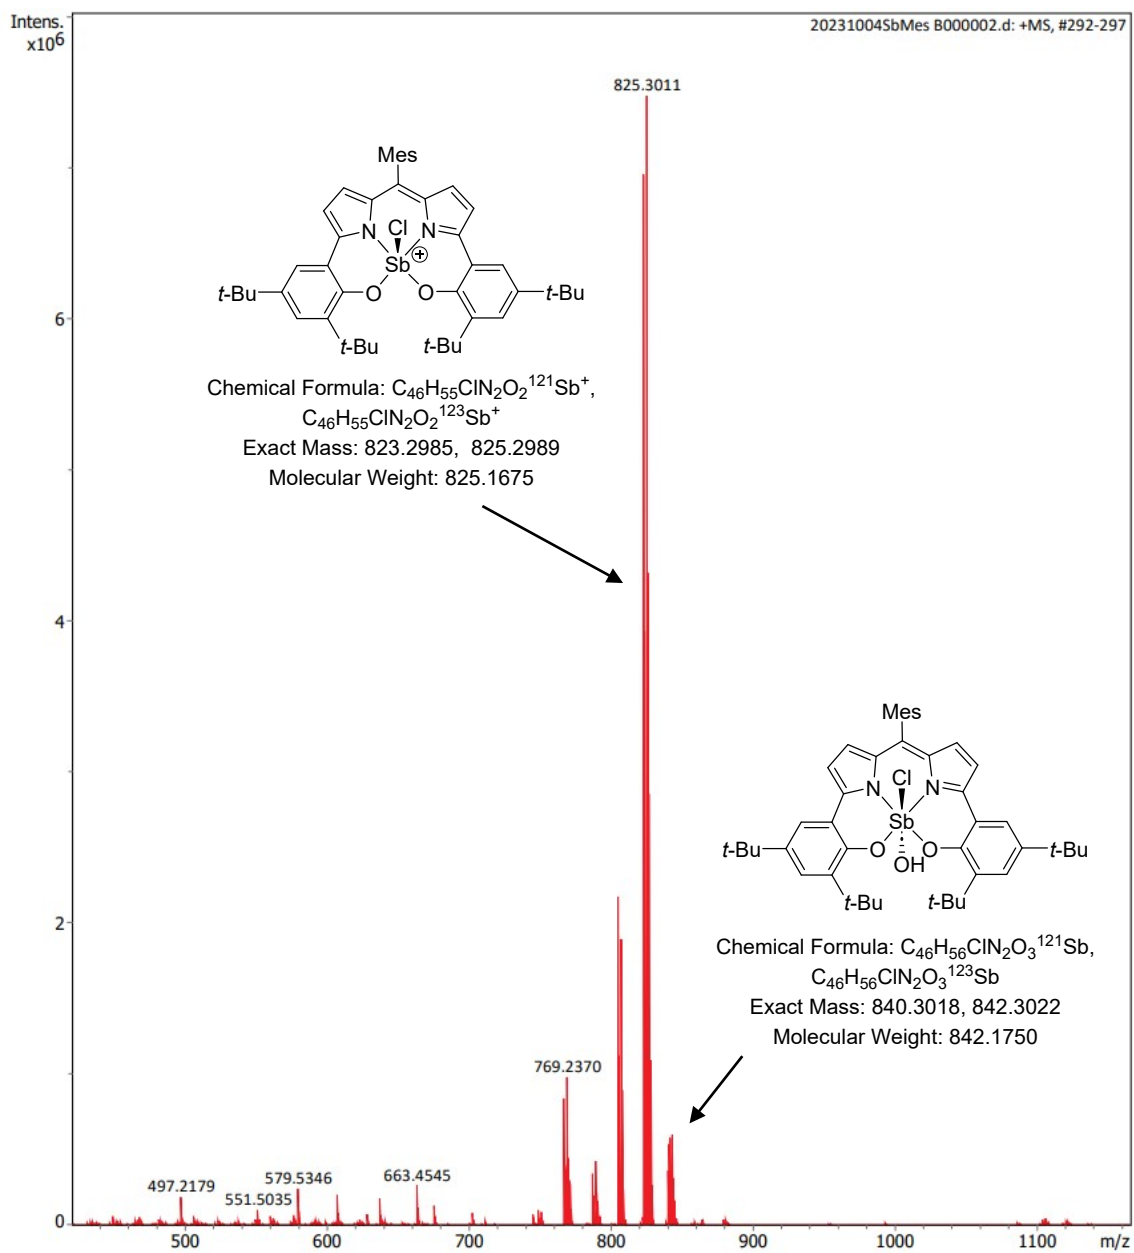

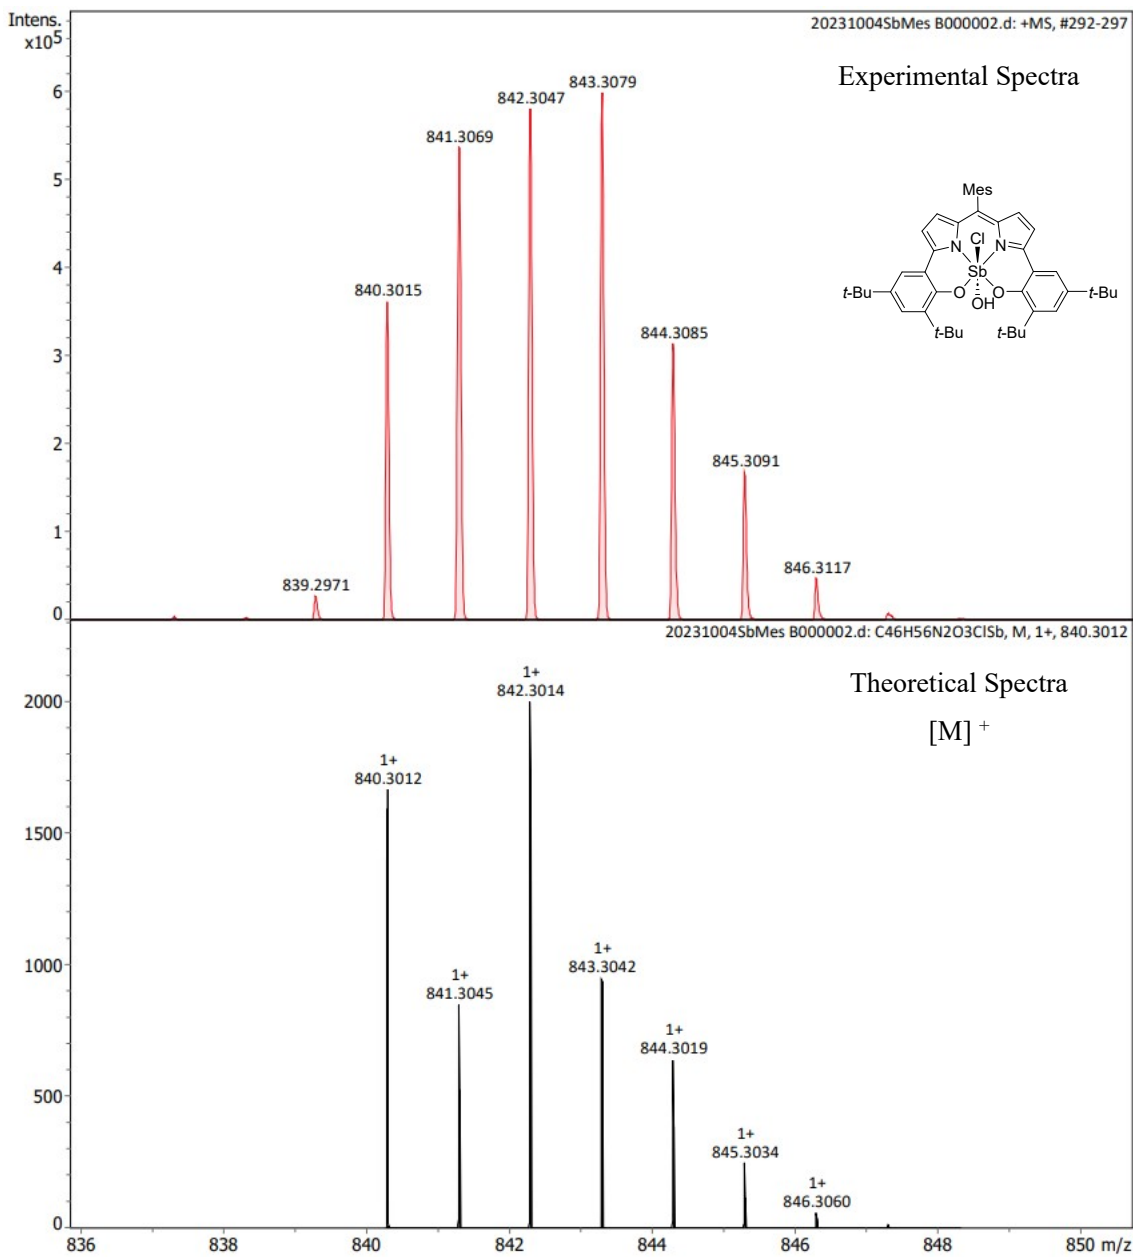



$^{13}\text{C}$  NMR (150 MHz,  $\text{CDCl}_3$ )

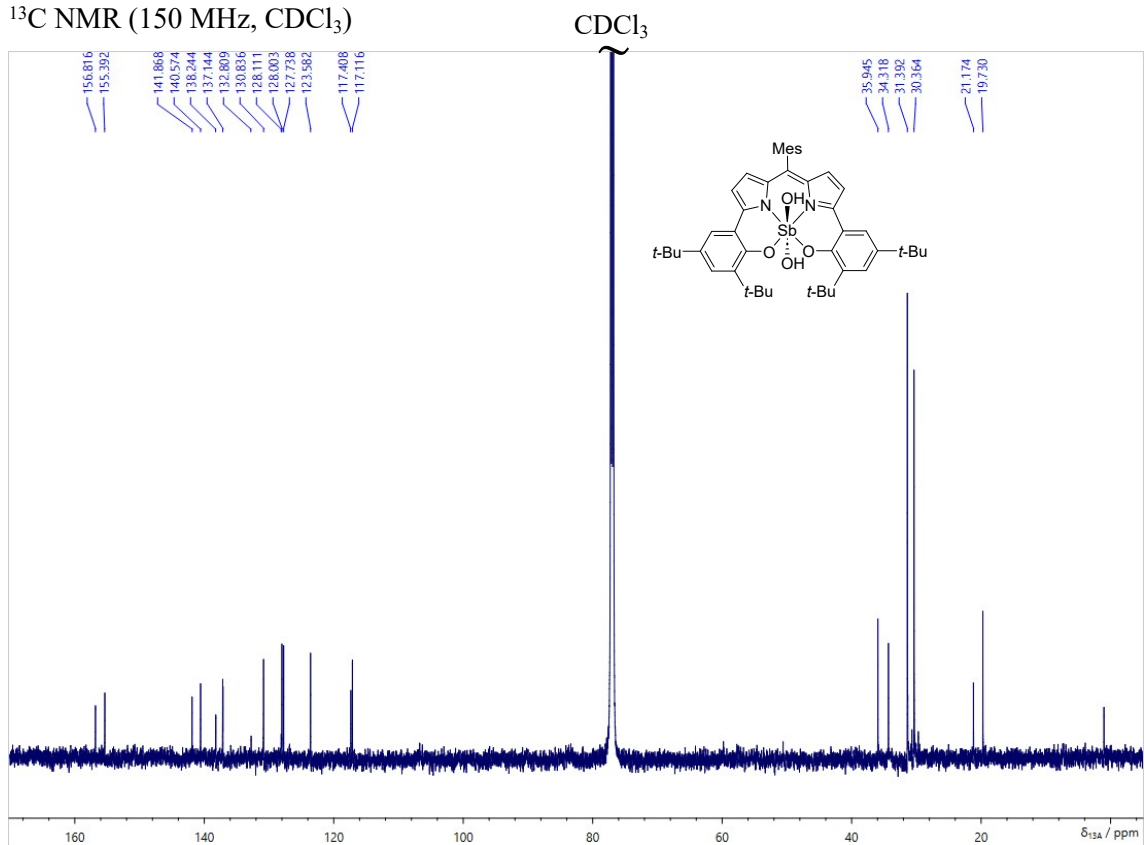

HRMS (ESI-neg, solvent: CH<sub>3</sub>OH)

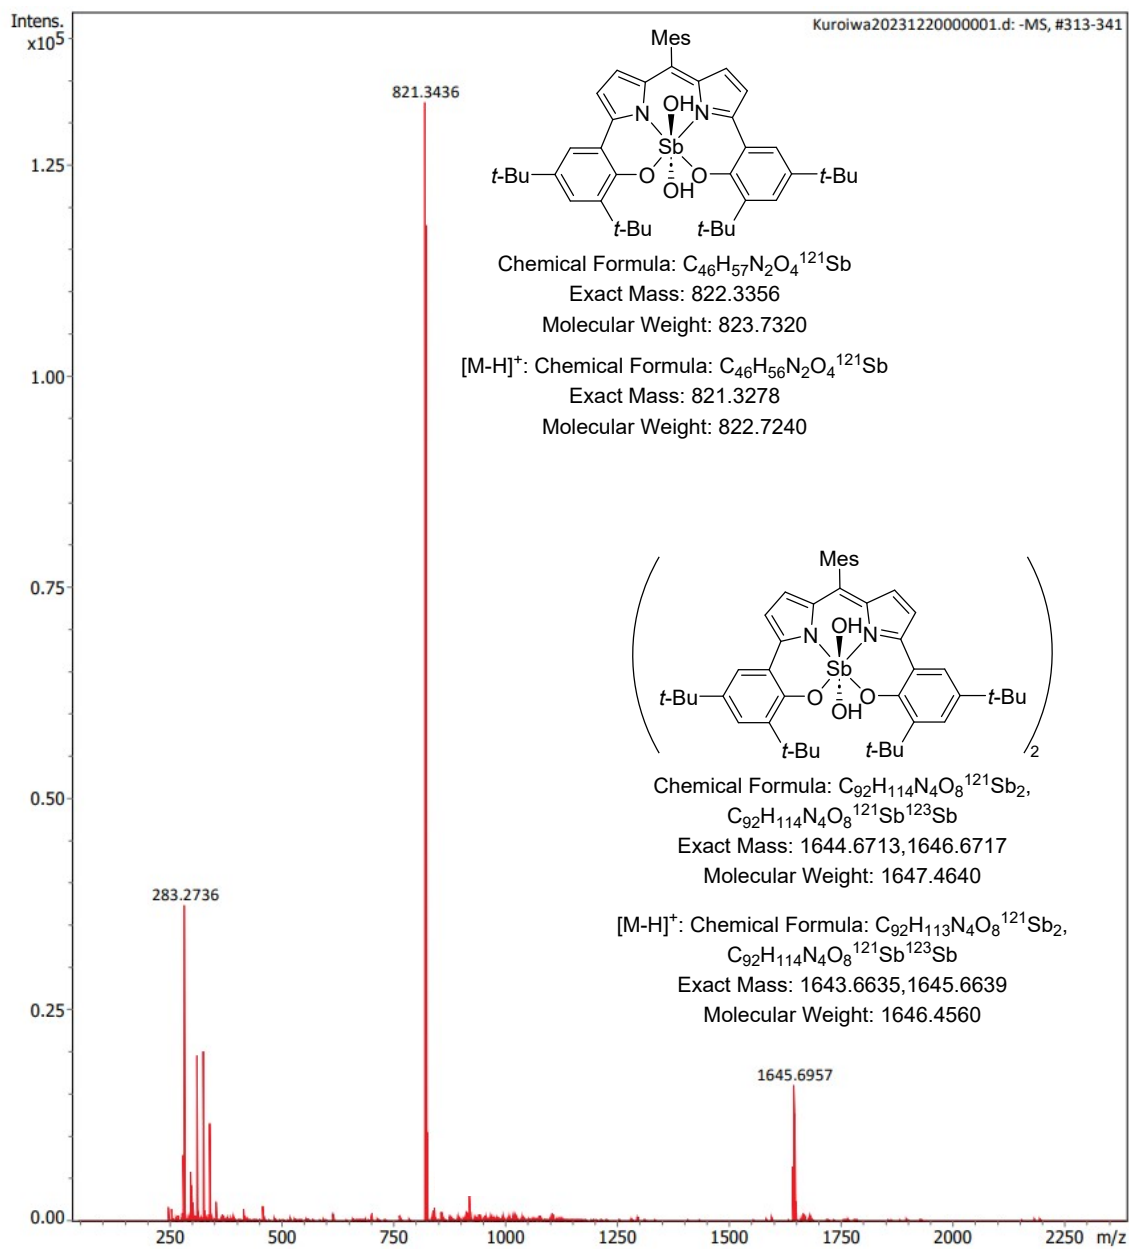



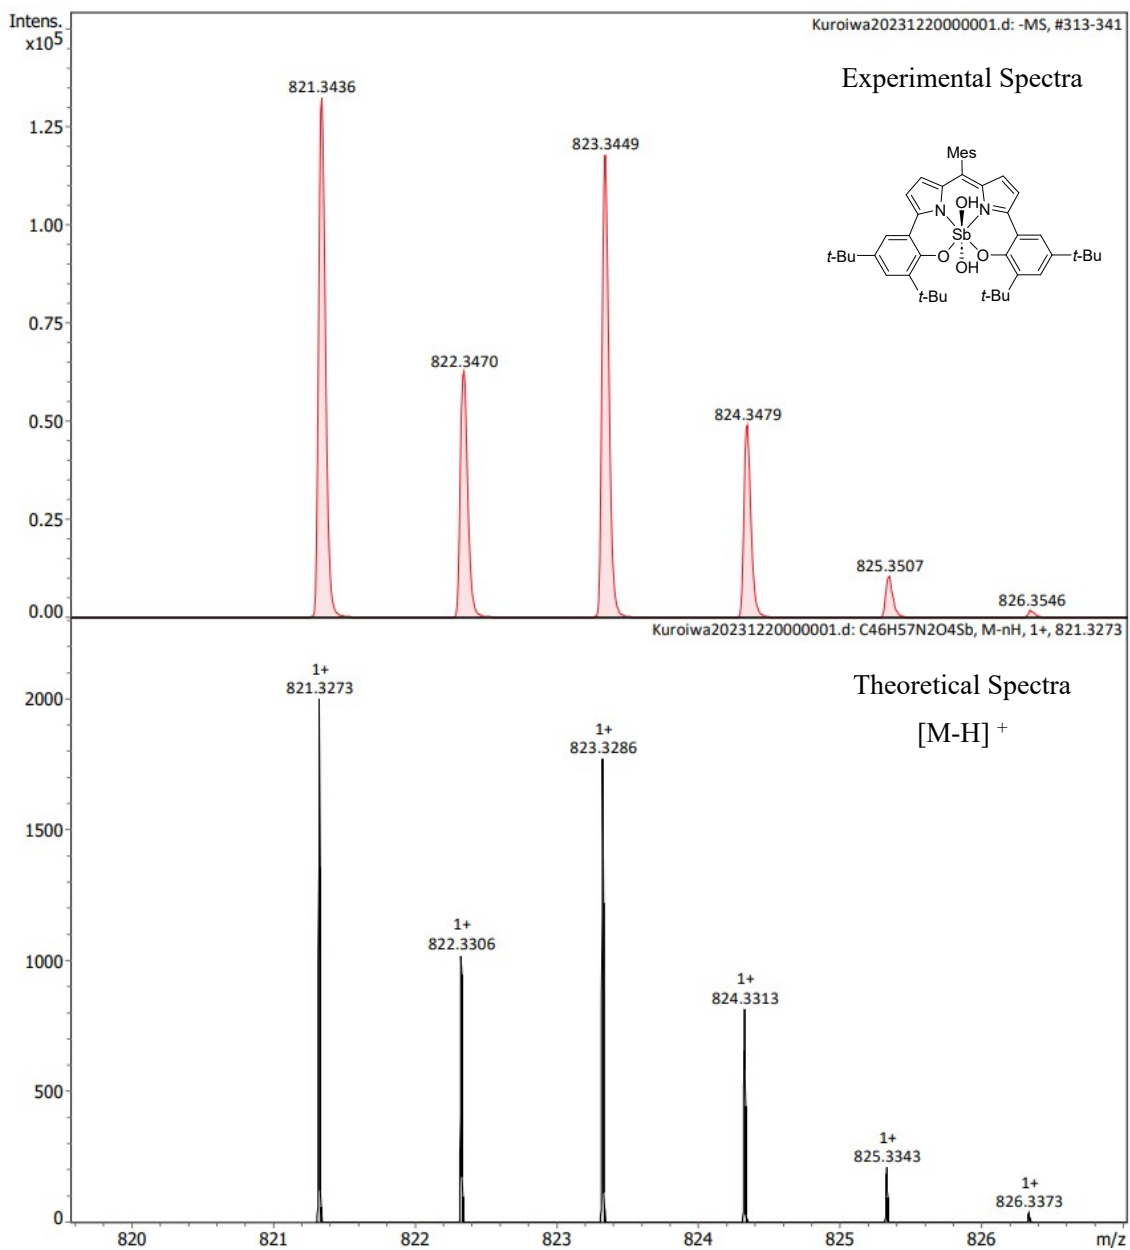

Supplement: d4cc00630e1.pdf [file d4cc00630e1.pdf]
